# Theta and alpha EEG oscillations reflect sleep need — except during the wake maintenance zone

Sophia Snipes<sup>1,2\*</sup>, Elias Meier<sup>1</sup>, Sarah Meissner<sup>2</sup>, Hans-Peter Landolt<sup>3,4</sup>, Reto Huber<sup>1,4,5</sup>

<sup>1</sup> Child Development Center, University Children's Hospital Zürich, University of Zürich, Switzerland

<sup>2</sup> Neural Control of Movement Lab, Department of Health Sciences and Technology, ETH Zürich, Switzerland

<sup>3</sup> Institute of Pharmacology and Toxicology, University of Zürich, Zürich, Switzerland

<sup>4</sup> Sleep & Health Zürich, University of Zürich, Zürich, Switzerland

<sup>5</sup> Department of Child and Adolescent Psychiatry and Psychotherapy, Psychiatric Hospital, University of Zürich, Switzerland

\* corresponding author: [sophia.snipes@kispi.uzh.ch](mailto:sophia.snipes@kispi.uzh.ch)

Conceptualization, SS, RH; Methodology: SS, SM, RH; Formal Analysis, SS, EM; Investigation, SS, EM; Resources, HPL, RH; Writing-Original Draft, SS; Writing-Review & Editing, SS, EM, SM, HPL, RH; Supervision, RH; Funding acquisition, RH.

## 1 **ABSTRACT**

2 Increasing time spent awake results in accumulated sleep need, a process known as sleep homeosta-  
3 sis. Sleep homeostasis combines with a 24 h circadian rhythm to determine when and for how long  
4 we sleep. Both sleep homeostasis and the circadian rhythm substantially affect spectral power of the  
5 wake electroencephalogram (EEG), but not in ways predicted by current models. Specifically, these  
6 models hypothesize that time spent awake increases neuronal synaptic strength, which increases syn-  
7 chronization and should therefore increase oscillatory activity. However, the dominant wake EEG os-  
8 cillations, measured as theta (4-8 Hz) and alpha power (8-12 Hz), do not follow the predicted buildup  
9 in homeostatic sleep pressure with time awake. This is due to a limitation of spectral power analysis,  
10 which does not distinguish between changes in the amplitude of oscillations from changes in the quan-  
11 tity of oscillations present in the signal. We wished to determine whether the amplitudes of EEG os-  
12 cillations would specifically reflect homeostatic sleep pressure, independently from changes in quan-  
13 tity. We collected data from 18 young healthy adults during a 4-h sleep / 24-h extended wake para-  
14 digm. We indeed found that theta and alpha oscillation amplitudes reflect homeostatic sleep pressure,  
15 increasing along a saturating exponential function with time awake. Instead, theta quantities in-  
16 creased linearly with time awake, and alpha quantities decreased. Notably, theta and alpha ampli-  
17 tudes temporarily decreased during the wake maintenance zone (WMZ), a 3-4 h time window just  
18 before bedtime when it is difficult to fall asleep. Using pupillometry, we also found that mean pupil  
19 diameter increased during this window, while variance decreased. These results suggest that the WMZ  
20 is dependent on an alerting signal from the ascending arousal system. The WMZ therefore counteracts  
21 the observed build-up in homeostatic sleep pressure reflected in EEG amplitudes by temporarily  
22 desynchronizing cortical activity.

## 1 INTRODUCTION

2 Good sleep is essential for daily functioning and overall quality of life. The reason we need sleep is so  
3 that physiological systems used during the day have a dedicated period to rest and conduct structural  
4 maintenance (Vyazovskiy & Harris, 2013), clear metabolic by-products (Hauglund et al., 2020; Xie et  
5 al., 2013), restore overall functioning to baseline levels (Killgore, 2010; Van Dongen et al., 2003), and  
6 more. This is referred to as *sleep homeostasis* and is especially critical for the brain. Also important is  
7 the timing of sleep, controlled by a 24-h *circadian rhythm* which allow independent systems across  
8 the body and brain to synchronize their recovery in order to optimize overall performance. These ho-  
9 meostatic and circadian fluctuations make up the two-process model of sleep (Borbély, 1982). To-  
10 gether they create *sleep pressure*, which is the drive to fall asleep when needed and at the right time.

11 The homeostatic process in particular was designed to explain the notable changes in sleep slow  
12 waves, electroencephalographic (EEG) oscillations between 0.5 and 4 Hz that characterize NREM sleep  
13 (non rapid-eye-movement sleep, i.e. stages 2 & 3). Slow wave activity decreases exponentially during  
14 NREM sleep, reflecting homeostatic sleep pressure dissipation. Vice versa, slow wave activity at the  
15 beginning of sleep depends on the duration of prior wake, following an increasing saturating expo-  
16 nential function (Dijk et al., 1987). This means that the buildup in sleep need is steepest during the  
17 initial hours of wake, then gradually saturates with additional time awake (Figure 1A).

18 A possible explanation for this increase in slow wave activity is that wakefulness progressively in-  
19 creases neuronal synaptic strength, which then requires sleep to restore overall synaptic balance. This  
20 is one of the key points of the synaptic homeostasis hypothesis (Tononi & Cirelli, 2003). In essence,  
21 learning during the day occurs through strengthening synaptic connections. Increased synaptic  
22 strength increases overall connectivity which leads to increased synchronicity of neuronal activity  
23 across the brain. This increased synchronicity between neurons will result in more synchronized oscil-  
24 lations in the surface EEG, detected as oscillations with larger amplitude with steeper slopes. Using  
25 computational models (Esser et al., 2007), animal sleep data (Vyazovskiy et al., 2007), and human  
26 sleep data (Riedner et al., 2007), the proponents of this hypothesis demonstrated how decreasing  
27 synaptic strength across sleep results in decreasing slow wave amplitudes and slopes. They argue that  
28 this buildup of synaptic connectivity during the day is one of the fundamental reasons sleep is needed:  
29 to restore neural synaptic homeostasis to baseline levels (Tononi & Cirelli, 2003, 2014).

30 While synaptic strength and sleep homeostasis can explain slow wave activity in sleep, they do not  
31 likewise explain changes in wake oscillations. Human wake EEG is predominantly characterized by al-  
32 pha oscillations (8-12 Hz) and to a lesser extent theta oscillations (4-8 Hz), often measured as power

1 in the frequency domain. Theoretically, the increased connectivity with time spent awake should af-  
2 fect these oscillations along a similar increasing saturating exponential function as for slow waves in  
3 sleep. However, while theta power does increase with sleep deprivation, the effect is rather linear  
4 (Finelli et al., 2000). Furthermore alpha power actually decreases (Cajochen et al., 2002).

5 In addition to neither oscillation following a homeostatic trajectory, both are also affected by circadian  
6 rhythmicity (Aeschbach et al., 1997; Cajochen et al., 2002; Strijkstra et al., 2003), further masking po-  
7 tential homeostatic effects. Alpha activity fluctuates in phase with core body temperature, a reliable  
8 circadian marker peaking in the middle of the day and lowest in the middle of the night (Åkerstedt et  
9 al., 1979; Cajochen et al., 2002). Instead, theta activity is lowest in the evening, corresponding to the  
10 wake maintenance zone (WMZ; Strogatz et al., 1987; Zeeuw et al., 2018). The WMZ, more dramatically  
11 known as the “forbidden sleep zone”, is a circadian window of 3-4 hours just prior to melatonin onset  
12 in which sleep becomes exceptionally difficult (Lavie, 1997). During the WMZ, sleep onset latencies  
13 substantially increase even during extensive sleep deprivation (Dijk & Czeisler, 1995; Lavie, 1986), sub-  
14 jective sleepiness decreases, and behavioral performance improves (McMahon et al., 2018, 2021;  
15 Shekleton et al., 2013; Zeeuw et al., 2018). The timing of the WMZ is not reflected in circadian markers  
16 such as melatonin levels or core body temperature, it has not been reported in any animal models to  
17 our knowledge, and is not represented in the classic two-process model of sleep.

18 Therefore, while increasing synaptic strength would have predicted an increase in both theta and al-  
19 pha power with time spent awake, in practice neither oscillation strictly reflects this buildup in home-  
20 ostatic pressure, and they are further synchronized to different circadian phases. However, the fact  
21 that wake oscillations do not reflect sleep homeostasis may be due to a limitation of spectral power  
22 analyses. “Power” refers to the amount of energy in a frequency band, and is typically calculated using  
23 some variant of the fast Fourier transform (M. X. Cohen, 2014). Once a time-series signal has been  
24 transformed into the frequency domain, power values are averaged or summed within a frequency  
25 range of interest, and this is the power for that band. While this is a simple and generally effective  
26 measure for quantifying oscillatory activity, it is simultaneously affected by the *quantity* of oscillations  
27 present in the signal and their *amplitude*, as well as broad-band changes in the entire spectrum (Do-  
28 noghue et al., 2020).

29 The synaptic homeostasis hypothesis predicts that an increase in synaptic connectivity results in an  
30 increase in oscillatory amplitudes; this does not need to have any bearing on the number of oscilla-  
31 tions that actually occur. It is therefore possible that non-homeostatic factors such as the WMZ could  
32 independently affect the quantity of oscillations, whereas time spent awake more specifically affects  
33 their amplitude. When both oscillation amplitudes and quantities change independently across wake

1 recordings, the resulting power values will reflect some undifferentiated mix between the two. By  
2 separating these contributions, we may have a specific marker of homeostatic sleep pressure during  
3 wake. Not only would this provide supporting evidence for the hypothesis that sleep homeostasis is  
4 linked to synaptic plasticity, but also provide a marker for sleep pressure more easily acquired than  
5 slow wave activity during sleep.

6 We therefore wished to determine whether the circadian and homeostatic influences on theta and  
7 alpha oscillations could be dissociated in resting wake EEG by separately measuring changes in ampli-  
8 tude and changes in quantities of oscillations. Eighteen young healthy adults participated in a 4/24  
9 extended wake paradigm (Figure 1A), in which they slept the first 4 hours of the night and were then  
10 kept awake for 24 hours with repeated resting state recordings (Figure 1B), while measuring high-  
11 density EEG. We conducted cycle-by-cycle analysis (Cole & Voytek, 2019) to identify bursts of oscilla-  
12 tions in the theta and alpha range, a method which identifies oscillations based on the morphology of  
13 the EEG signal rather than relying on power and amplitude thresholds. We then looked at changes in  
14 the mean amplitude of bursts and the average number of cycles (i.e., oscillations present in a burst)  
15 per minute for each band. Our prediction was that both theta and alpha amplitudes would follow an  
16 increasing saturating exponential function across extended wake, and show decreases following sleep.  
17 At the same time, the decrease in alertness with time awake should result in a decrease in the overall  
18 number of alpha oscillations. Likewise, circadian changes such as the decrease in theta during the  
19 WMZ should be reflected in decreases in the number of bursts.

20 To independently monitor changes in alertness across the extended wake period, we also recorded  
21 pupillometry with infrared cameras. Pupillometry and ocular behavior are indirect but rich signals  
22 thought to reflect activity of deep-brain nuclei. Pupil diameter and pupil responses to salient stimuli  
23 have been linked to alertness-promoting activity in the locus coeruleus (Aston-Jones & Cohen, 2005;  
24 Joshi et al., 2016; Murphy et al., 2014), as well as other interconnected nuclei in the brainstem and  
25 forebrain that make up the ascending arousal system (AAS) (Lloyd et al., 2022; Reimer et al., 2016).  
26 Blink rates have been shown to be an indirect measure of dopamine function (Jongkees & Colzato,  
27 2016), and were hypothesized to reflect a compensation mechanism to counteract sleep deprivation  
28 (Barbato et al., 2007). Similarly, extended eye-closure can reflect microsleeps (Ong et al., 2013), which  
29 can anticipate the onset of whole-brain sleep (Skorucak et al., 2020). While there are still many open  
30 questions about the link between ocular behavior and sleep/wake promoting nuclei, the relationship  
31 between any of these signals and EEG could help better explore the underlying mechanisms driving  
32 the changes in oscillatory activity across extended wake. In short, while the two-process model and  
33 the synaptic homeostasis hypothesis provide specific predictions about wake EEG amplitudes, with  
34 pupillometry we hoped to provide possible explanations for changes in oscillatory occurrences.

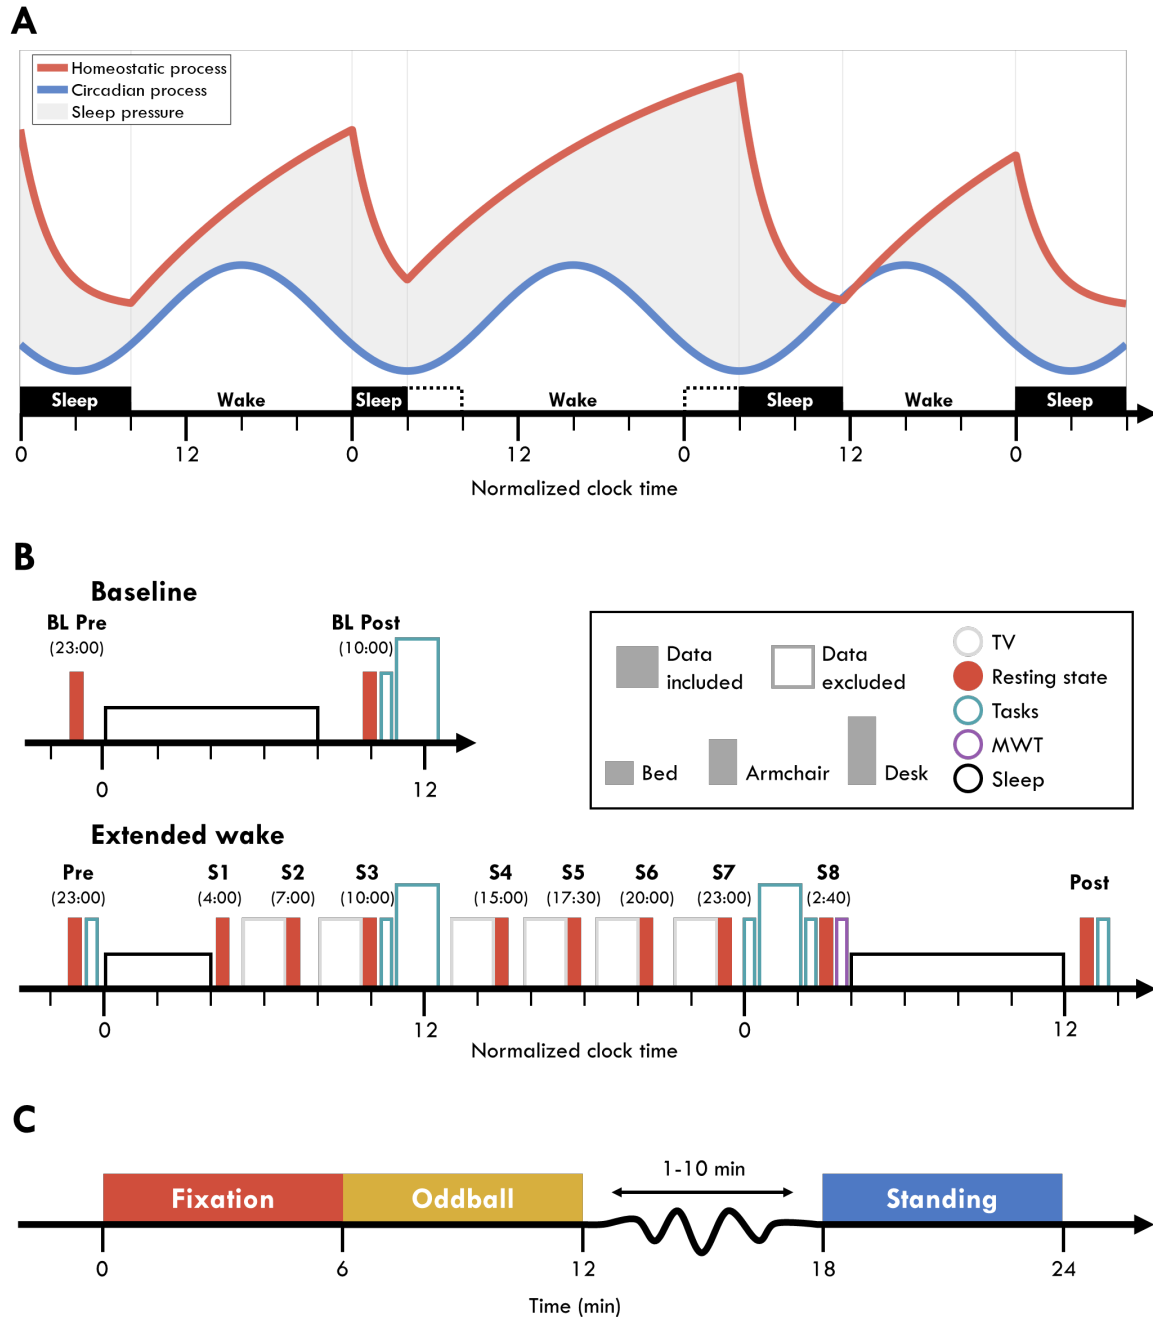

1

2 **Figure 1: Experiment design.** A) The two-process model during a 4/24 sleep/wake schedule. The red line reflects the homeo-  
3 static process, building sleep pressure monotonically with wake and dissipating during sleep. The blue line reflects the circa-  
4 dian process, peaking in the middle of the day and at its lowest in the middle of the night, independent of actual sleep and  
5 wake behavior. The shaded area reflects the resulting sleep pressure from combining these two processes. Black blocks indi-  
6 cate when participants actually slept, whereas the dotted outline indicates the window in which they would have slept ac-  
7 cording to their circadian rhythm. B) Experiment schedule. Each block indicates an EEG recording session. Filled blocks indicate  
8 data analyzed in this paper. Color indicates the activity participants engaged in: gray, watching TV; red, the resting state  
9 recordings in C; teal, task blocks analyzed in Snipes et al. (2022); purple, the MWT; black, sleep. The height of each block  
10 indicates the condition in which data was collected: short, lying in bed; medium, seated in a comfortable armchair with foot  
11 and backrest / standing; tall, seated at a desk. Brief empty spaces indicate transition periods allowing for delays. Six longer  
12 breaks were included prior to each TV block in which participants were provided with meals. Circadian time was normalized  
13 across participants to their habitual bedtime. Participants at baseline and during the recovery night were free to wake up  
14 when they wished, and at the beginning of the extended wake period they were woken up after 4 h of sleep. C) Timeline for  
15 the resting state recordings. Each condition was 6 minutes, and always done in the depicted order. Between the Oddball and  
16 Standing, a questionnaire was conducted which took a variable amount of time, followed by moving the participant from the  
17 armchair to standing. Abbreviations: BL, Baseline; MWT, Maintenance of Wakefulness Task.

## 1   **RESULTS**

2   We recorded EEG, pupillometry, and questionnaire data from participants performing 3 wake resting  
3   state recordings, for 6 minutes each (Figure 1C). The first was a standard recording, *Fixation*, in which  
4   participants were seated in a comfortable armchair and had to gaze at a fixation point ~3 m away. The  
5   second was an active auditory *Oddball*, in which tones were presented randomly and participants had  
6   to push a button after “oddball” (i.e. deviant) tones. Afterwards participants filled out a questionnaire,  
7   and then got up for the final recording of *Standing* with eyes closed. They were asked to stand for this  
8   condition because during sleep deprivation participants quickly fall asleep with eyes closed. These rest  
9   recordings were conducted 12 times: before and after each of the 3 nights of sleep, and 6 more times  
10   throughout the extended wake period, approximately 3 hours apart (Figure 1B). The primary focus of  
11   this study was the Fixation condition, used in previous studies. The other two conditions were included  
12   to establish to what extent the observed effects extended to different resting states.

13   Participants maintained a regular sleep-wake schedule the week prior to each experiment bout, and  
14   therefore the timing of the individual 24 h circadian sleep rhythm could be inferred from previous  
15   studies (Åkerstedt et al., 1979; Dijk & Czeisler, 1995; Wyatt et al., 1999). Changes synchronized to  
16   melatonin would be high during night recordings (S1, S2, S8), and low during day recordings. Vice  
17   versa, circadian changes synchronized to core body temperature would peak in the middle of the day  
18   (S4, S5), and be low in the middle of the night (S1, S8). Because the focus was on homeostatic changes,  
19   these comparisons were not statistically analyzed, but can be inferred from the outcome measures’  
20   trajectories.

21   To quantify the effects of extended wake, sleep, and the WMZ, for each outcome measure we con-  
22   ducted the same three paired t-tests. For wake-dependent changes, we compared values from the  
23   start and end of the 24 h extended wake period, S1 and S8. These were within 2 h of the same circadian  
24   phase, therefore any differences should largely be due to sleep homeostasis. To quantify sleep-de-  
25   pendent changes, we compared values from the wake recordings before and after the baseline night,  
26   BL Pre and BL Post. Unlike for wake changes, these were conducted at different circadian times and  
27   the difference in sleep homeostatic pressure was lower, however these are typical recordings during  
28   sleep studies.

29   To statistically quantify any deviation during the WMZ from the underlying trajectory of a given out-  
30   come measure, we linearly interpolated values from S5 (17:30) to S8 (2:40) for timepoint 21:30 and  
31   compared it to the average of S6 (20:00) and S7 (23:00). The timepoints of the WMZ were determined  
32   based on the converging results of subjective sleepiness (Figure 2) and theta power (Figure 3A), both

- 1 of which showed a decrease in an otherwise monotonic increase during recordings S6 and S7, corre-  
2 sponding to 1-4 h before habitual bedtime.

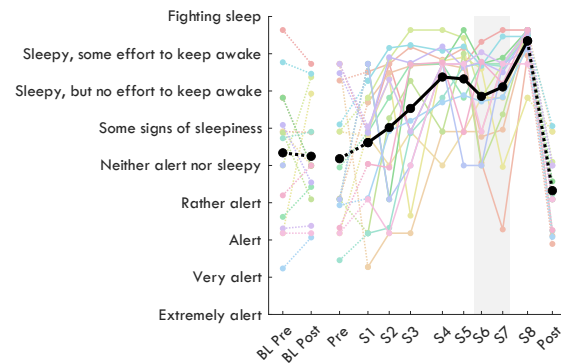

3

- 4 **Figure 2: Subjective sleepiness.** Sleepiness was measured on a continuous visual-analog adaptation of the KSS, using the  
5 original labels as markers (y-axis). The thick black line indicates the group average, and thin colored lines are datapoints of  
6 individual participants. Solid lines connect sessions during the same-day extended wake period, and dashed lines indicate  
7 changes across sleep. S1-S8 are spaced out relative to the time they occurred within the 24 h wake period (Figure 1B). The  
8 shaded gray area indicates the WMZ. Acronyms: BL, baseline; KSS, Karolinska Sleepiness Scale; WMZ, wake maintenance  
9 zone.

- 10 All t-values, degrees of freedom, p-values, and Hedge's g effect sizes are provided together in Table 1.  
11 Throughout the text, only the corresponding t-values will be reported, unless either effect sizes or p-  
12 values are specifically of interest (e.g. when trending).

13



|                               | Condi-<br>tion | Overnight baseline                      | Extended wake                           | WMZ                                     |
|-------------------------------|----------------|-----------------------------------------|-----------------------------------------|-----------------------------------------|
| <b>Sleepiness</b>             | –              | $t_{(15)} = -0.21, p = .833, g = -0.06$ | $t_{(16)} = 7.36, p < .001, g = 2.61$   | $t_{(16)} = -3.36, p = .004, g = -1.13$ |
| <b>Theta power</b>            | Fixation       | $t_{(17)} = -4.80, p < .001, g = -0.83$ | $t_{(16)} = 9.66, p < .001, g = 2.99$   | $t_{(16)} = -5.96, p < .001, g = -1.78$ |
|                               | Oddball        | $t_{(17)} = -3.19, p = .005, g = -0.70$ | $t_{(16)} = 10.41, p < .001, g = 3.76$  | $t_{(16)} = -6.92, p < .001, g = -2.17$ |
|                               | Standing       | $t_{(16)} = -0.57, p = .574, g = -0.14$ | $t_{(16)} = 5.97, p < .001, g = 2.26$   | $t_{(16)} = -5.19, p < .001, g = -1.21$ |
| <b>Alpha power</b>            | Fixation       | $t_{(17)} = 1.75, p = .098, g = 0.26$   | $t_{(16)} = 3.03, p = .008, g = 1.07$   | $t_{(16)} = -2.86, p = .011, g = -0.63$ |
|                               | Oddball        | $t_{(17)} = 0.82, p = .421, g = 0.13$   | $t_{(16)} = 3.89, p = .001, g = 1.32$   | $t_{(16)} = -3.61, p = .002, g = -0.89$ |
|                               | Standing       | $t_{(16)} = 2.57, p = .020, g = 0.71$   | $t_{(16)} = -1.44, p = .168, g = -0.49$ | $t_{(16)} = -1.13, p = .276, g = -0.16$ |
| <b>Theta burst amplitude</b>  | Fixation       | $t_{(15)} = -2.06, p = .057, g = -0.74$ | $t_{(16)} = 6.71, p < .001, g = 2.40$   | $t_{(16)} = -3.19, p = .006, g = -0.70$ |
|                               | Oddball        | $t_{(16)} = -1.99, p = .064, g = -0.47$ | $t_{(15)} = 6.92, p < .001, g = 2.51$   | $t_{(16)} = -4.78, p < .001, g = -1.50$ |
|                               | Standing       | $t_{(16)} = -2.55, p = .022, g = -0.55$ | $t_{(16)} = 2.15, p = .047, g = 0.80$   | $t_{(16)} = -0.46, p = .655, g = -0.10$ |
| <b>Alpha burst amplitude</b>  | Fixation       | $t_{(17)} = -5.55, p < .001, g = -0.75$ | $t_{(16)} = 4.49, p < .001, g = 1.65$   | $t_{(16)} = -3.71, p = .002, g = -0.97$ |
|                               | Oddball        | $t_{(17)} = -2.00, p = .061, g = -0.43$ | $t_{(16)} = 7.52, p < .001, g = 2.18$   | $t_{(16)} = -6.47, p < .001, g = -1.58$ |
|                               | Standing       | $t_{(16)} = 0.14, p = .889, g = 0.04$   | $t_{(16)} = 0.17, p = .870, g = 0.06$   | $t_{(16)} = -2.22, p = .041, g = -0.32$ |
| <b>Theta burst cycles/min</b> | Fixation       | $t_{(17)} = 1.08, p = .295, g = 0.34$   | $t_{(16)} = 5.57, p < .001, g = 2.00$   | $t_{(16)} = -1.77, p = .095, g = -0.58$ |
|                               | Oddball        | $t_{(17)} = 1.25, p = .227, g = 0.30$   | $t_{(16)} = 7.80, p < .001, g = 2.52$   | $t_{(16)} = -4.03, p = .001, g = -1.24$ |
|                               | Standing       | $t_{(16)} = 0.67, p = .513, g = 0.24$   | $t_{(16)} = 4.68, p < .001, g = 1.70$   | $t_{(16)} = -5.02, p < .001, g = -1.66$ |
| <b>Alpha burst cycles/min</b> | Fixation       | $t_{(17)} = 3.32, p = .004, g = 0.96$   | $t_{(16)} = -2.87, p = .011, g = -1.13$ | $t_{(16)} = 1.98, p = .065, g = 0.67$   |
|                               | Oddball        | $t_{(17)} = 2.63, p = .017, g = 0.77$   | $t_{(16)} = -3.31, p = .004, g = -1.37$ | $t_{(16)} = 2.51, p = .023, g = 0.48$   |
|                               | Standing       | $t_{(16)} = 3.63, p = .002, g = 0.89$   | $t_{(16)} = -6.17, p < .001, g = -1.73$ | $t_{(16)} = 2.91, p = .010, g = 0.56$   |
| <b>Pupil diameter (mean)</b>  | Fixation       | $t_{(13)} = 0.39, p = .699, g = 0.13$   | $t_{(16)} = -3.78, p = .002, g = -1.22$ | $t_{(15)} = 4.65, p < .001, g = 1.26$   |
|                               | Oddball        | $t_{(12)} = -1.79, p = .099, g = -0.47$ | $t_{(12)} = -1.39, p = .189, g = -0.59$ | $t_{(12)} = 2.17, p = .051, g = 0.64$   |
| <b>Pupil diameter (SD)</b>    | Fixation       | $t_{(13)} = -3.76, p = .002, g = -0.98$ | $t_{(16)} = 3.52, p = .003, g = 1.25$   | $t_{(15)} = -1.69, p = .111, g = -0.65$ |
|                               | Oddball        | $t_{(12)} = -3.66, p = .003, g = -1.22$ | $t_{(12)} = 4.74, p < .001, g = 1.56$   | $t_{(12)} = -2.58, p = .024, g = -0.90$ |
| <b>Pupil oddball response</b> | Oddball        | $t_{(9)} = 0.26, p = .802, g = 0.07$    | $t_{(11)} = -1.58, p = .143, g = -0.55$ | $t_{(9)} = 2.08, p = .067, g = 0.74$    |
| <b>Blink rate</b>             | Fixation       | $t_{(13)} = -1.32, p = .209, g = -0.39$ | $t_{(16)} = 0.62, p = .545, g = 0.22$   | $t_{(15)} = -1.25, p = .229, g = -0.42$ |
|                               | Oddball        | $t_{(13)} = -0.02, p = .987, g = -0.01$ | $t_{(13)} = 4.37, p = .001, g = 1.44$   | $t_{(15)} = -0.21, p = .839, g = -0.08$ |
| <b>Ocular microsleeps (%)</b> | Fixation       | $t_{(13)} = -0.97, p = .350, g = -0.32$ | $t_{(16)} = 4.81, p < .001, g = 1.56$   | $t_{(15)} = -4.85, p < .001, g = -1.68$ |
|                               | Oddball        | $t_{(13)} = -1.32, p = .210, g = -0.47$ | $t_{(13)} = 4.18, p = .001, g = 1.41$   | $t_{(15)} = -6.28, p < .001, g = -2.16$ |

1 **Table 1: Statistics results.** Paired *t*-tests were conducted to determine overnight changes at baseline (BL Pre vs BL Post),  
2 changes across 24 h of extended wake (S1 vs S8), and deviations from the wake trajectories during the WMZ (S5&S8 vs  
3 S6&S7). All values were z-scored for each participant, pooling sessions, and conditions. Power values were z-scored separately  
4 for each frequency prior to being averaged into bands, and pupil oddball responses were z-scored also across timepoints prior  
5 to measuring the average the response. Degrees of freedom are specified in the subscript of *t*-values and reflect the number  
6 of datapoints for each comparison ( $N = DF + 1$ ). Effect sizes are provided as Hedge's *g* values. All statistics are with  $\alpha = 5\%$ .  
7 There is no correction for multiple comparisons. Acronyms: WMZ, wake maintenance zone; BL, baseline; SD, standard deviation.  
8

## 9 **Changes in theta power but not alpha power replicate previous results**

10 Before investigating oscillatory burst activity, we first determined whether our novel experimental  
11 paradigm replicated findings of previous studies showing both circadian and homeostatic changes in  
12 theta and alpha power. We expected an increase in theta and a decrease in alpha with increasing time  
13 awake, as well as a dip in theta during the WMZ, and a peak in alpha in the middle of the day (Cajochen  
14 et al., 2002). Power spectral density was calculated using Welch's method for every channel during



1 each recording. These values were z-scored separately for each frequency, pooling channels, condi-  
2 tions, and sessions. Z-scored power values were then averaged across channels, and then averaged  
3 within the theta and alpha bands.

4 Changes in theta power are plotted in Figure 3A. After the baseline night, there was a significant de-  
5 crease in theta power for the Fixation ( $t_{(17)} = -4.80$ ) and Oddball recordings ( $t_{(17)} = -3.19$ ), but no  
6 change during Standing with eyes closed ( $t_{(16)} = -0.57$ ). Across extended wake there was a substantial  
7 increase in theta power in all conditions (Fixation,  $t_{(16)} = 9.66$ ; Oddball,  $t_{(16)} = 10.41$ ; Standing,  $t_{(16)} =$   
8  $5.97$ ). During the WMZ, all conditions showed very large and significant decreases in theta power (Fix-  
9 ation,  $t_{(16)} = -5.96$ ; Oddball,  $t_{(16)} = -6.92$ ; Standing,  $t_{(16)} = -5.19$ ).

10 Changes in alpha power are plotted in Figure 3B. After the baseline night, alpha power showed a trend  
11 increase for Fixation ( $t_{(17)} = 1.75$ ,  $p = .098$ ), no change for Oddball ( $t_{(17)} = 0.82$ ), and a significant in-  
12 crease during Standing ( $t_{(16)} = 2.57$ ). Across extended wake, alpha actually increased for Fixation ( $t_{(16)}$   
13  $= 3.03$ ) and Oddball ( $t_{(16)} = 3.89$ ) and showed no significant change during Standing, although on aver-  
14 age decreased ( $t_{(16)} = -1.44$ ). A significant dip in alpha was present during the WMZ in the Fixation  
15 condition ( $t_{(16)} = -2.86$ ) and even more prominent in the Oddball ( $t_{(16)} = -3.61$ ).

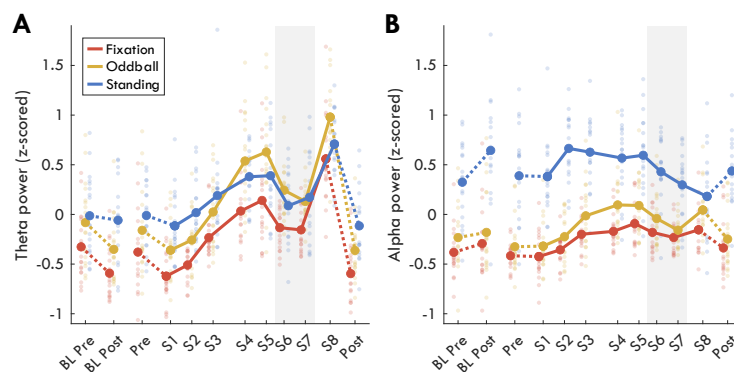

16

17 **Figure 3: Z-scored power band changes. A) Theta power (4-8 Hz) and B) alpha power (8-12 Hz).** Thick lines indicate group  
18 averages for each condition (as different colors) across sessions (x-axis). Solid lines connect sessions during the same-day  
19 extended wake period, and dashed lines indicate changes across sleep. S1-S8 are spaced out relative to the time they occurred  
20 within the 24 h wake period (Figure 1B). Dots reflect individual participants' datapoints. The shaded gray area indicates the  
21 WMZ. Power spectral density values were first z-scored for each frequency pooling channels, sessions, and conditions. All  
22 channels were included in the average except edge channels: 48, 63, 68, 73, 81, 88, 94, 99, 119. Finally, z-scored values within  
23 each band range were averaged. Acronyms: BL, baseline; WMZ, wake maintenance zone.

24 Given the discrepancy with previous results that found decreases in alpha with sleep deprivation (Ca-  
25 jochen et al., 2002; Strijkstra et al., 2003), we inspected the spectrograms of z-scored power to deter-  
26 mine whether some other factor was contributing to the increase in alpha power in our data. The  
27 power spectrums for each condition and for three regions of interest (ROI; Front, Center, and Back)

1 across the 8 extended wake sessions are plotted in Figure 4. Theta created a distinct peak in the spec-  
2 trum in the Front ROI, and alpha created a prominent peak in the Back ROI, especially in the eyes-  
3 closed Standing condition. During S8, both a theta and an alpha peak was present in the Back ROI.  
4 Notably, the alpha peak did in fact decrease in amplitude following extended wake in the Fixation and  
5 Oddball Back ROI, but at the same time there were broad-spectrum increases from S1 to S8. Further-  
6 more, the increase in both theta and beta (15-30 Hz) bled into the alpha range, especially in the Front  
7 and Center ROI. The change in spectrum was more unusual during the Standing recordings, with S8  
8 not showing the same distinctive alpha peak in the Back ROI, but rather a new 6-10 Hz peak instead.  
9 These results confirm that theta and alpha were distinct oscillations. However, there seem to be also  
10 broadband increases in power with extended wake, and the changes in neighboring bands likely af-  
11 fected average alpha power as well.

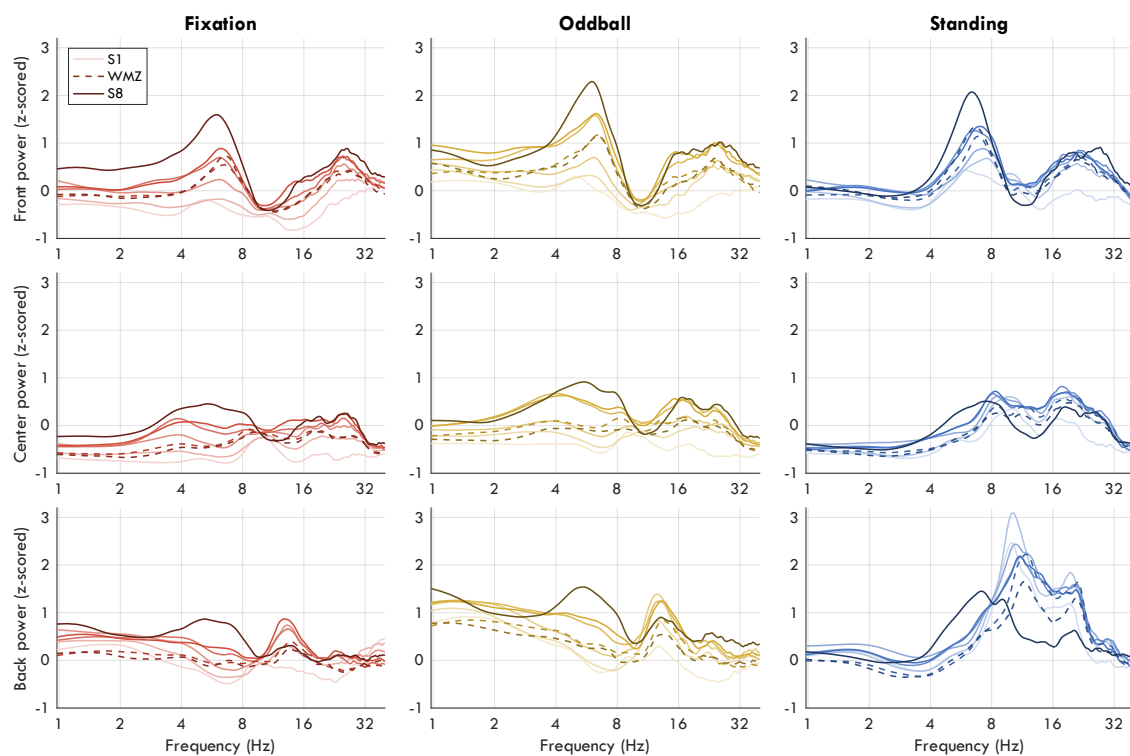

12

13 **Figure 4: Z-scored power spectrums across extended wake.** Each row plots an ROI (Front, Center, Back), each column a  
14 different condition. Color darkness indicates session, from S1 to S8, such that darker lines indicate more time awake. Dashed  
15 lines are the WMZ recordings (S6, S7). The x-axis indicates frequency on a log scale. Exact channels of the ROIs are provided  
16 in Snipes et al. (2022). Acronyms: WMZ, wake maintenance zone; ROI, region of interest.

## 17 **Cycle-by-cycle analysis successfully captures oscillatory activity**

18 Cycle-by-cycle analysis was used to identify bursts between 2 and 14 Hz. Figure 5 provides an example  
19 of the EEG and burst detection during S8. Analyses were then performed on bursts between 4 and 8

1 Hz for theta, and 8 and 12 Hz for alpha. Oscillation amplitudes were quantified as the average negative-to-positive peak amplitude for all the cycles involved in a burst. The “number” of oscillations were  
2  
3 quantified as the number of cycles per minute.

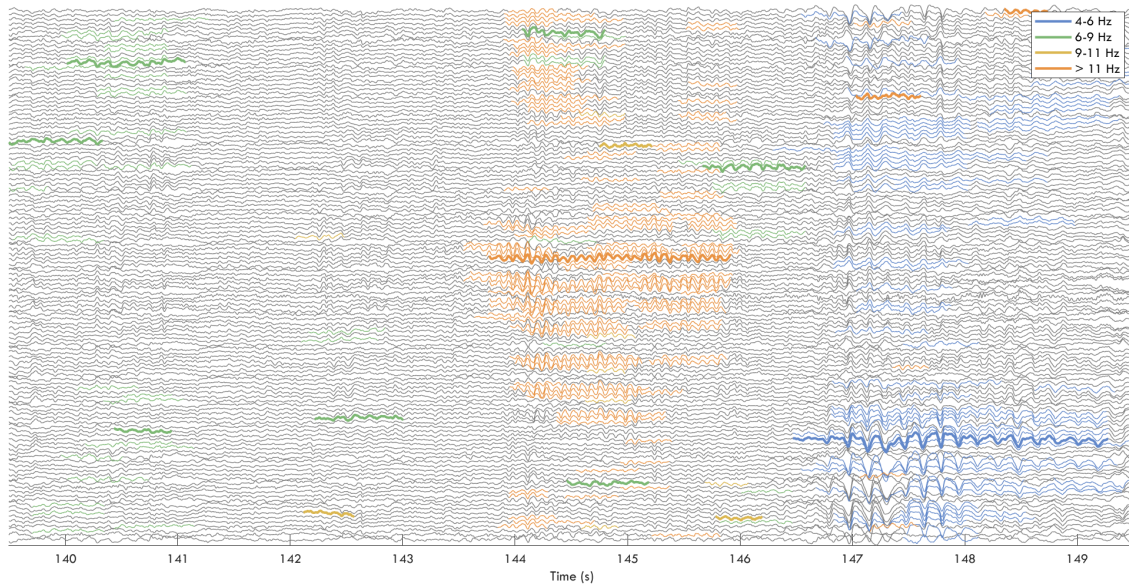

4

5 **Figure 5: Example of detected bursts.** 10 seconds of data from P15 Fixation (see Figure 6A). EEG data traces are in gray. Thick  
6 colored lines indicate the “reference” burst, the longest among temporally overlapping bursts in the same channel. Thin col-  
7 ored lines indicate overlapping bursts across channels considered to be the “same” burst as the reference. These were asso-  
8 ciated with the reference because mean frequencies were within 1 Hz of each other. Different colors represent different fre-  
9 quency bands. Acronyms: EEG, electroencephalography.

10 Figure 6A-B plots the distribution of the number of bursts by frequency for two example participants.  
11 Cycle-by-cycle analysis allowed clear differentiation between clusters of bursts by frequency. How-  
12 ever, many individuals did not have two (theta/alpha), but in fact three or more clusters, and these  
13 distributions changed with time awake (best example: Figure 6A, Fixation). At the same time, other  
14 participants showed more classical bimodal distributions (Figure 6B). Ideally, we would have used in-  
15 dividualized bands to delineate theta and alpha, however these shifting distributions complicate such  
16 an approach. Therefore, we limited ourselves to group average results using traditional frequency  
17 bands. Furthermore, rather than quantifying the occurrence of a given oscillation by the number of  
18 bursts as shown in Figure 6A-C, we used instead the number of cycles per minute (Figure 6G), as this  
19 also captures changes in burst duration (Figure 6E).

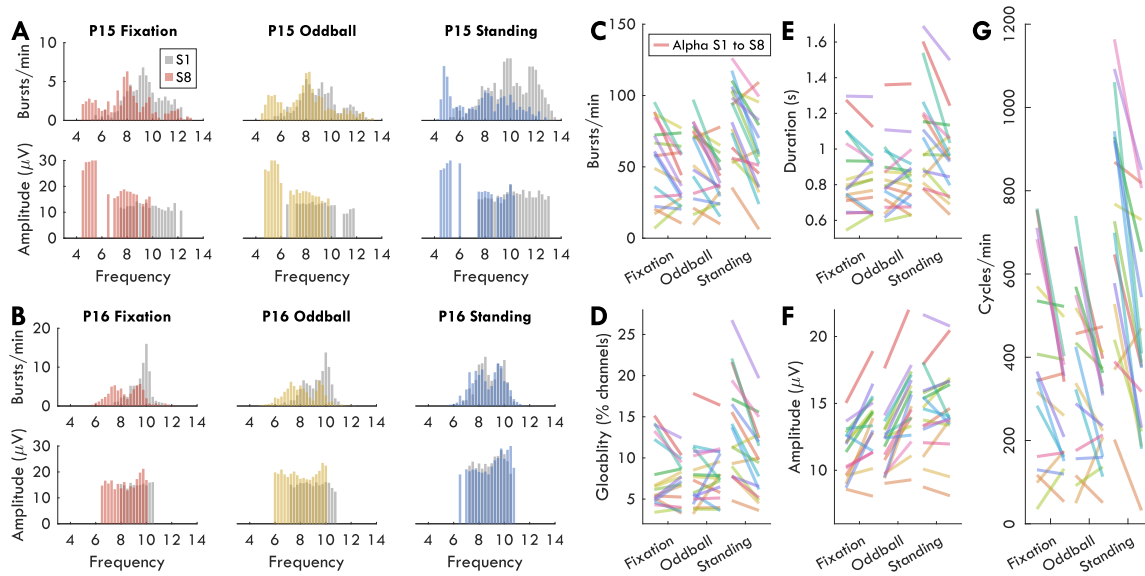

1

2 **Figure 6: Distributions of bursts by condition.** A-B) Distribution of number of bursts per minute for each frequency (top plot)  
 3 and average amplitudes (bottom plot) for two participants (A, P15; B, P16). Gray histogram depicts data from the first extended  
 4 wake recording (S1), and colored histograms the last (S8). Missing values in the amplitude plot correspond to bins for  
 5 which there were fewer than 10 bursts across the 6 min recording. C) Alpha bursts per minute for all participants from S1 (left  
 6 point of each colored line) to S8 (right point) for each condition. Each participant is a different color. D) Average alpha globality,  
 7 measured as the percentage of channels with an overlapping burst within  $\pm 1$  Hz of the reference burst. E) Average alpha  
 8 burst duration in seconds. F) Average alpha amplitudes, in microvolts. G) Average cycles per minute.

## 9 Oscillation amplitudes increase with extended wake, but decrease during the 10 WMZ

11 Figure 7 plots the change in theta (left column) and alpha bursts (right column) by average amplitude  
 12 (top row), and cycles per minute (bottom row). Amplitudes tended to decrease after baseline sleep  
 13 for theta (Fixation:  $t_{(15)} = -2.06$ ,  $p = .057$ ; Oddball:  $t_{(16)} = -1.99$ ,  $p = .064$ ; Standing:  $t_{(16)} = -2.55$ ,  $p =$   
 14  $.022$ ). Amplitudes significantly decreased after sleep for alpha Fixation ( $t_{(17)} = -5.55$ ), were trending  
 15 for Oddball ( $t_{(17)} = -2.00$ ,  $p = .061$ ), and showed no change during Standing ( $t_{(16)} = 0.14$ ). During extended  
 16 wake, amplitudes increased substantially for both theta and alpha in the Fixation (theta  $t_{(16)} =$   
 17  $6.71$ ; alpha  $t_{(16)} = 4.49$ ) and Oddball conditions (theta  $t_{(15)} = 6.92$ ; alpha  $t_{(16)} = 7.52$ ). Theta amplitudes  
 18 increased during wake in Standing ( $t_{(16)} = 2.15$ ,  $p = .047$ ) but no change was observed in alpha ampli-  
 19 tudes during Standing ( $t_{(16)} = 0.17$ ). The trajectory of the increase in amplitudes for both theta and  
 20 alpha, and Fixation and Oddball, approximated that of an increasing saturating exponential function,  
 21 with steeper increases at the beginning compared to end of the wake period. Against our expecta-  
 22 tions, however, both theta and alpha showed a robust decrease in amplitude during the WMZ for both  
 23 Fixation (theta  $t_{(16)} = -3.19$ ; alpha  $t_{(16)} = -3.71$ ) and Oddball (theta  $t_{(16)} = -4.78$ ; alpha  $t_{(16)} = -6.47$ ).

24 Changes across baseline sleep in cycles per minute went in the opposite direction from amplitudes:  
 25 theta quantities on average increased although this was not significant (Fixation  $t_{(17)} = 1.08$ ; Oddball

1  $t_{(17)} = 1.25$ ; Standing  $t_{(16)} = 0.67$ ) and alpha significantly increased (Fixation  $t_{(17)} = 3.32$ ; Oddball  $t_{(17)} =$   
 2 2.63; Standing  $t_{(16)} = 3.63$ ). During extended wake, theta quantities significantly increased in all condi-  
 3 tions along a mostly linear trajectory (Fixation  $t_{(16)} = 5.57$ ; Oddball  $t_{(16)} = 7.80$ ; Standing  $t_{(16)} = 4.68$ ),  
 4 whereas alpha quantities decreased (Fixation  $t_{(16)} = -2.87$ ; Oddball  $t_{(16)} = -3.31$ ; Standing  $t_{(16)} = -6.17$ ),  
 5 primarily during S8. Theta and alpha cycles were significantly affected by the WMZ in opposite direc-  
 6 tions during the Standing (theta  $t_{(16)} = -5.02$ ; alpha  $t_{(16)} = 2.51$ ) and Oddball conditions (theta  $t_{(16)} =$   
 7  $-4.03$ ; alpha  $t_{(16)} = 2.91$ ) but trending in Fixation (theta  $t_{(16)} = -1.77$ ,  $p = .095$ ; alpha  $t_{(16)} = 1.98$ ,  $p = .065$ ),  
 8 such that theta quantities decreased relative to the overall trajectory, and alpha increased (or did not  
 9 decrease along the expected trajectory).

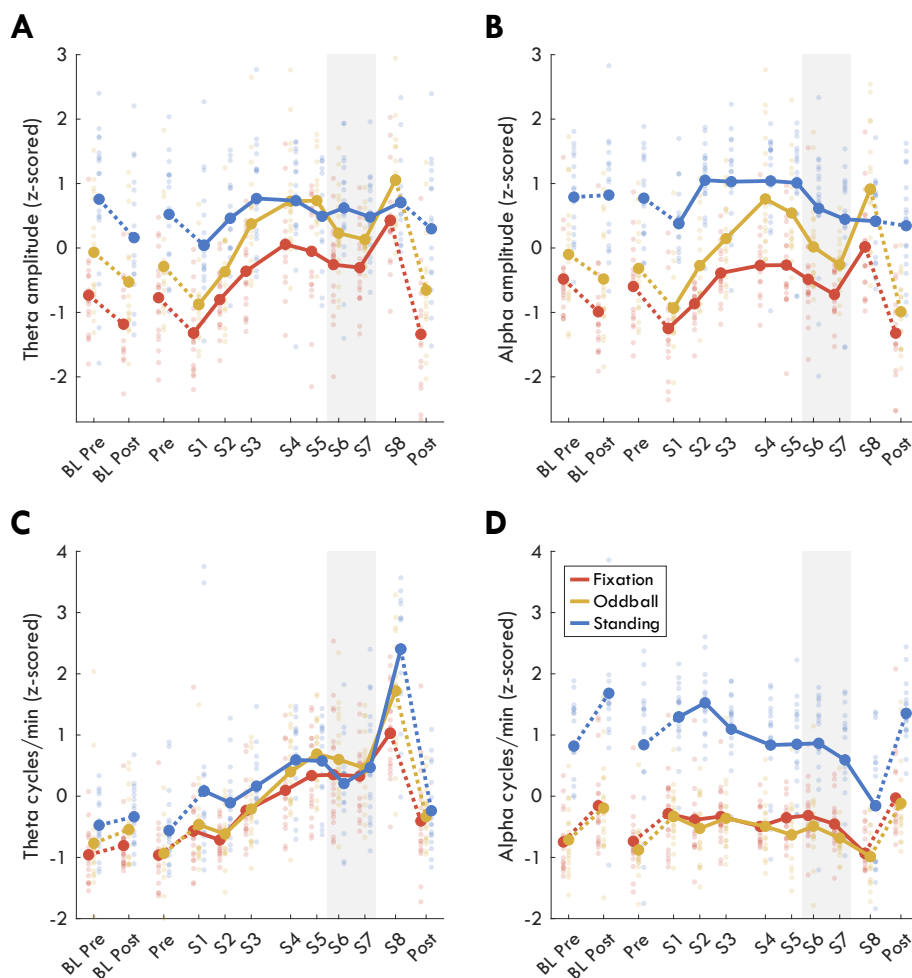

10

11 **Figure 7: Z-scored burst changes in amplitude and quantity.** A) Average theta burst amplitudes, B) alpha burst amplitudes,  
 12 C) number of theta cycles per minute, D) alpha cycles per minute. Thick lines indicate group averages for each condition across  
 13 sessions (x-axis), with color indicating condition. Solid lines connect sessions during the same-day extended wake period, and  
 14 dashed lines indicate changes across sleep. S1-S8 are spaced out relative to the time they occurred within the 24 h wake  
 15 period (Figure 1B). Dots reflect individual participants' datapoints. The shaded gray area indicates the WMZ. All values are z-  
 16 scored within each figure, such that sessions and conditions were pooled. Acronyms: BL, baseline; WMZ, wake maintenance  
 17 zone.



1 To determine whether oscillation amplitudes and quantities originated from the same areas, we  
2 inspected the mean distribution of amplitudes and cycles per minute for theta and alpha bursts across  
3 the 123 channels, pooling sessions (Figure 8A-B). To determine whether the changes observed in Fig-  
4 ure 7 were spatially dependent, we performed paired t-tests between S1 and S8 for each channel,  
5 with false-discovery rate (FDR) correction (Figure 8C-D).

6 For all three conditions, theta bursts were located primarily in frontal-midline channels, which also  
7 generated the largest amplitudes (Figure 8A). The increases observed with extended wake were wide-  
8 spread although somewhat patchy for both amplitudes and cycles per minute (Figure 8C), and were  
9 not limited to the main frontal-midline sources of theta. Alpha amplitudes and cycles per minute were  
10 instead spatially dissociated (Figure 8B), with high amplitudes originating more occipitally, and high  
11 quantities originating more centro-parietally. While the increase in alpha amplitudes in the Fixation  
12 and Oddball were similarly widespread as in theta, during the Standing condition the increase was  
13 only frontal (Figure 8D, top row). Instead, the decrease in alpha quantities was localized to the centro-  
14 parietal regions in Fixation and Oddball, with more widespread decreases in Standing (Figure 8D, bot-  
15 tom row).

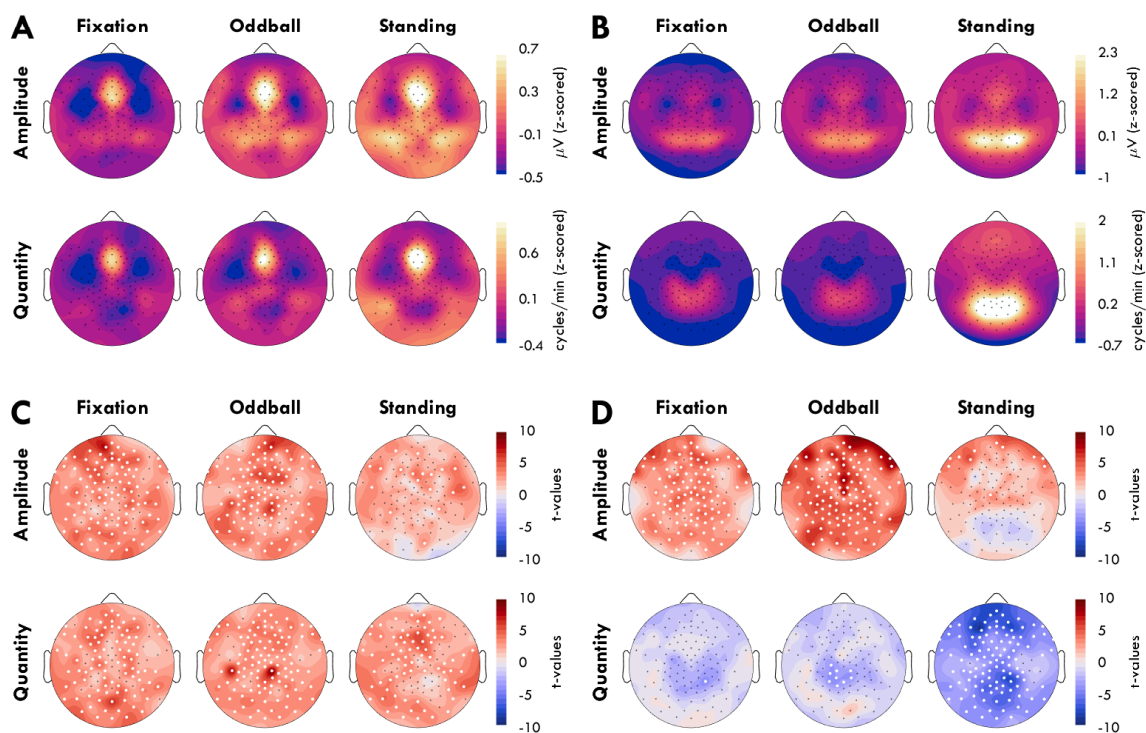

16

17 **Figure 8: Topographic distribution of burst amplitudes and cycles per second.** A-B Amplitudes (top row) and cycles per  
18 minute (bottom row) for theta (A) and alpha bursts (B) across 123 channels for each condition, z-scored and averaged across  
19 all sessions. Warmer colors indicate higher amplitudes/quantities. C-D) Change in amplitudes and cycles/min from S1 to S8  
20 for theta (C) and alpha bursts (D) represented as t-values, such that red indicates an increase with time awake. White dots  
21 indicate channels for which the difference was significant ( $p < .05$ ,  $N = 17$ ) based on paired t-tests, with false discovery rate  
22 correction.

## 1 Mean pupil diameter and variance change during the wake maintenance zone, 2 while pupil responses to oddball tones do not

3 To explore further what drives the different trajectories observed in the EEG data across wake, and in  
4 particular the changes in the WMZ, we analyzed pupillometry data from the Fixation and Oddball con-  
5 ditions. In both, mean pupil diameter after an initial decrease remained largely constant during the  
6 extended wake period (Figure 9A), with a specific increase during the two WMZ timepoints (Fixation  
7  $t_{(15)} = 4.65$ ; Oddball  $t_{(12)} = 2.17$ ,  $p = .051$ ). There was also a significant drop in pupil diameter from S1  
8 to S8 during Fixation ( $t_{(16)} = -3.78$ ,  $p = .002$ ) but not Oddball ( $t_{(12)} = -1.39$ ,  $p = .189$ ). Interestingly, the  
9 two baseline recordings done in the evening an hour before bedtime (BL Pre, Pre) showed larger di-  
10 ameters during Oddball than during Fixation (BL Pre:  $t_{(12)} = 2.18$ ,  $p = .050$ ,  $g = 0.62$ ; Pre:  $t_{(16)} = 3.22$ ,  $p =$   
11  $.005$ ,  $g = 0.63$ ), but not during the same recording of extended wake (S7  $t_{(14)} = -0.77$ ,  $p = .453$ ,  $g = -$   
12  $0.16$ ). This indicates an interaction, at least within the WMZ, between recording condition, pupil di-  
13 ameter, and prior sleep restriction.

14 Standard deviations of pupil diameter were also assessed (Figure 9B). Across sleep, there was a large  
15 significant decrease in standard deviations for both conditions (Fixation  $t_{(13)} = -3.76$ ; Oddball  $t_{(12)} = -$   
16  $3.66$ ). During extended wake, standard deviations increased to maximum values in the afternoon (S4,  
17 15:00). Standard deviations then tended to decrease during the WMZ, although the effect was only  
18 significant in the Oddball ( $t_{(12)} = -2.58$ ,  $p = .024$ ) and not Fixation ( $t_{(15)} = -1.69$ ,  $p = .111$ ). Across wake  
19 there was a significant increase in standard deviations from S1 to S8 (Fixation  $t_{(16)} = 3.52$ ; Oddball  $t_{(12)}$   
20  $= 4.74$ ), although S8 Oddball values returned to those of S3-S5 after the WMZ, whereas S8 Fixation  
21 remained lower.

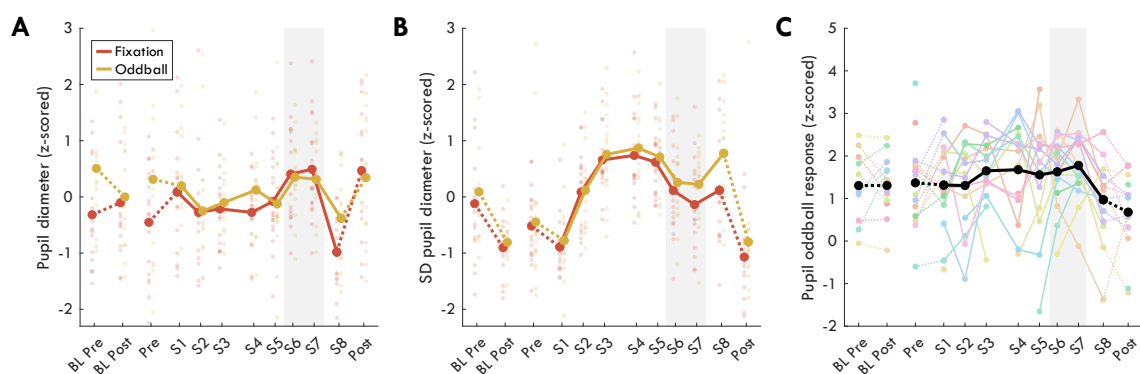

22

23 **Figure 9: Pupil diameter.** A) Mean diameter and B) standard deviations across the 6 minute recordings. Thick lines indicate  
24 group averages for each condition across sessions (x-axis). Solid lines connect sessions during the same-day extended wake  
25 period, and dashed lines indicate changes across sleep. Color indicates condition, dots reflect individual participants' data-  
26 points. S1-S8 are spaced out relative to the time they occurred within the 24 h wake period (Figure 1B). The shaded gray area  
27 indicates the WMZ. All values are z-scored within each figure, such that sessions and conditions were pooled. C) Oddball pupil  
28 diameter response to target tones relative to standard tones from 0.5 to 2 s after tone onset. Colored lines indicate data from



1 individual participants. Timecourses are provided in Figure 10. Acronyms: BL, baseline; SD, standard deviation; WMZ, wake  
2 maintenance zone.

3 Finally, we investigated the pupil response to target tones during the auditory Oddball condition (Fig-  
4 ure 9C, Figure 10). Unfortunately, there was substantial data loss due to increased eye-closure with  
5 extended wake (Figure 11B) combined with equipment malfunctions during measurements, so power  
6 for this analysis is reduced. Pupil response to oddball tones was quantified as the area under the curve  
7 between the pupil response to targets relative to standard tones, from 0.5 to 2 s after tone onset.

8 There was no change in response to targets from evening to morning around a baseline night of sleep  
9 ( $t_{(9)} = 0.26$ ), nor was there a significant change from beginning to end of the extended wake period,  
10 although there was on average a decrease in pupil oddball response ( $t_{(11)} = -1.58$ ). There was trending  
11 effect of the WMZ ( $t_{(9)} = 2.08$ ,  $p = .067$ ). However, as can be seen from Figure 9C, this was almost  
12 entirely due to a drop in the oddball response for S8 relative to previous sessions (e.g. S5 vs S8:  $t_{(10)} =$   
13  $2.77$ ,  $p = .020$ ,  $g = -1.07$ ). Furthermore, there was never a return to baseline values of pupil oddball  
14 response following recovery sleep (Pre vs Post:  $t_{(13)} = 2.43$ ,  $p = .030$ ,  $g = -0.62$ ), complicating any po-  
15 tential interpretation.

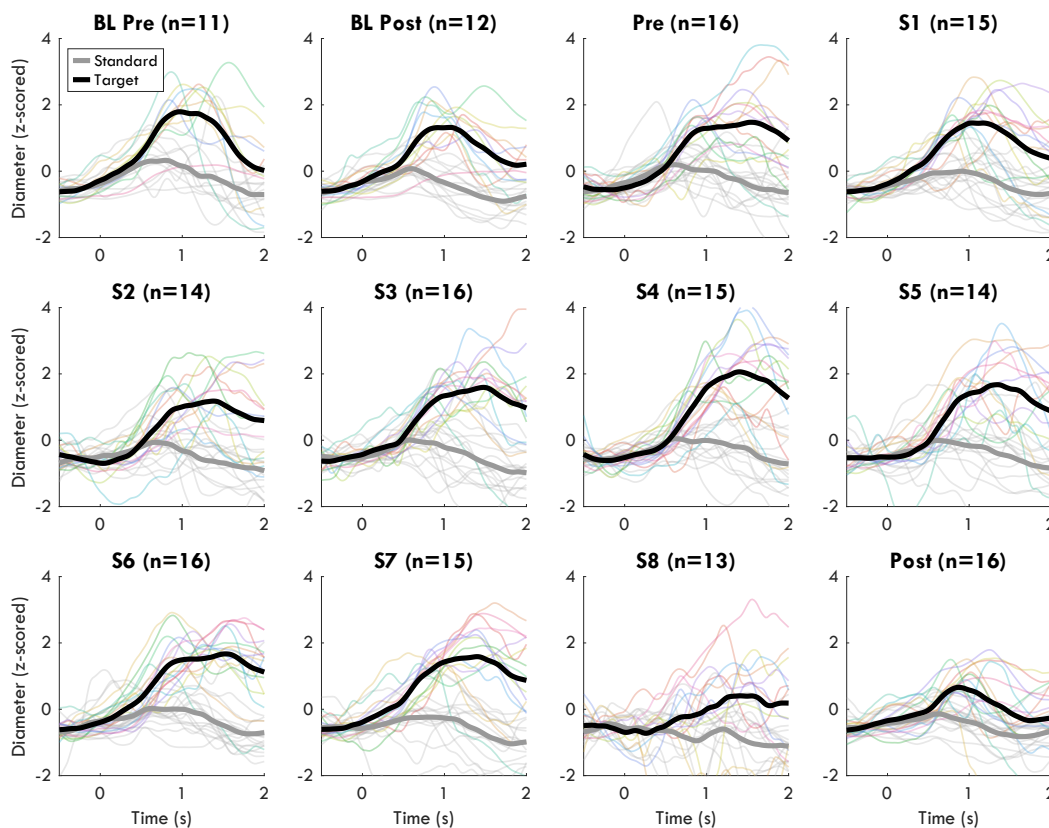

17 **Figure 10: Pupil response to tones in the Oddball.** Pupil diameters were locked to tone onset, baseline corrected (-.5 to 0 s  
18 from tone onset), and then z-scored pooling timepoints, tone type (target and standard), and session. Group average stand-  
19 ards are in gray, oddball targets in black. Individuals' response curves are thin gray lines, and individuals' target responses

1 are in thin colored lines. Timecourses were smoothed over 2 s for visualization. Due to data loss and increasing noise, multiple  
2 recording sessions were lost, and so the sample size for each session is indicated in the figure titles. Acronyms: BL, baseline.

### 3 **Ocular microsleeps are sensitive to the WMZ, blink rates are not**

4 In addition to actual pupil diameters, the same eye-tracking equipment could also be used to detect  
5 ocular behavior such as blinking and microsleeps, both of which increase with sleepiness (Crevits et  
6 al., 2003; Moller et al., 2006). We measured all eye-closures and split them into blinks when less than  
7 1 s (Fatt & Weissman, 2013; Kwon et al., 2013), and as ocular microsleeps when longer than 1 s (Hertig-  
8 Godeschalk et al., 2020; Ong et al., 2013). We specify “ocular” to distinguish from proper microsleeps  
9 detected with EEG (Hertig-Godeschalk et al., 2020) and “behavioral” microsleeps detected as perfor-  
10 mance lapses (Poudel et al., 2014).

11 Blink rates (Figure 11A) gradually increased across wake in the Oddball ( $t_{(13)} = 4.37$ ) but not Fixation  
12 condition ( $t_{(16)} = 0.62$ ), and there was no change during the WMZ (Fixation  $t_{(15)} = -1.25$ ; Oddball  $t_{(15)} =$   
13  $-0.21$ ). On the other hand, the number of microsleeps (Figure 11B) went from near zero to 10-15% of  
14 the recording across extended wake (Fixation  $t_{(16)} = 4.81$ ; Oddball  $t_{(13)} = 4.18$ ), and returned to <3%  
15 during the WMZ (Fixation  $t_{(15)} = -4.85$ ; Oddball  $t_{(15)} = -6.28$ ).

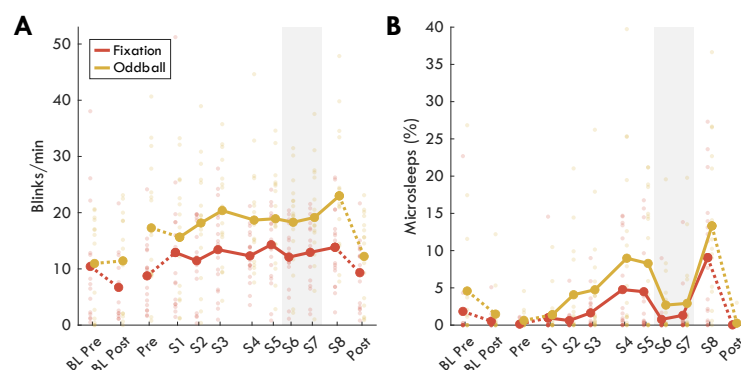

16

17 **Figure 11: Eye-closures. A)** Number of blinks per minute. A blink is defined as any eye-closure less than 1 s long. **B)** Percent of  
18 recording with ocular microsleeps (eyes closed longer than 1 s). N.B. here raw values are provided, although the statistics  
19 described in the text are with z-scored values. Thick lines indicate group averages for each condition across sessions (x-axis),  
20 with color indicating condition. Solid lines connect sessions during the same-day extended wake period, and dashed lines  
21 indicate changes across sleep. S1-S8 are spaced out relative to the time they occurred within the 24 h wake period (Figure  
22 1B). Dots reflect individual participants' datapoints. The shaded gray area indicates the WMZ. Acronyms: BL, baseline; WMZ,  
23 wake maintenance zone.

24

## 1 DISCUSSION

2 The two-process model of sleep postulates that sleep need accumulates along an increasing saturating  
3 exponential function with time spent awake (Figure 1A), and the sleep homeostasis hypothesis pro-  
4 poses that this process is driven by increasing synaptic strength, which results in increased neuronal  
5 synchrony (Borbély, 1982; Tononi & Cirelli, 2003). Consequently, wake EEG oscillation amplitudes  
6 should reflect homeostatic sleep pressure.

7 Our results reveal that indeed both theta and alpha amplitudes follow an increasing saturating expo-  
8 nential function across extended wake, following the trajectory of sleep homeostasis (Figure 7A-B).  
9 Furthermore, both theta and alpha amplitudes returned to baseline levels following recovery sleep,  
10 with trending decreases for theta and highly significant decreases for alpha around baseline sleep.  
11 These results therefore match the predictions of the two-process model and the synaptic homeostasis  
12 hypothesis. It is still possible that synaptic strength does not drive this increase in amplitudes, but at  
13 the very least, changes in wake oscillation amplitudes correspond to the changes observed in slow  
14 wave activity (Borbély, 1982; Dijk et al., 1987).

15 In particular, the fact that the number of alpha oscillations decreased at the same time as amplitudes  
16 increased, and the former was widespread and the latter was localized (Figure 8D), clearly indicates a  
17 dissociation between these homeostatic changes in amplitude from whatever process causes oscilla-  
18 tions to occur in the first place. More subtly, while both theta amplitudes and quantities increased  
19 during extended wake, the trajectories were different, suggesting again distinct mechanisms. Previ-  
20 ously, two landmark studies found that theta power in resting state EEG increased locally depending  
21 on prior daytime activity (Bernardi et al., 2015; Hung et al., 2013). Re-analysis of these datasets may  
22 reveal that this effect was specific to oscillation amplitudes, even in the alpha band, which would fur-  
23 ther support the interpretation that the local effects were driven by synaptic plasticity.

24 ***Sensitivity of different conditions to sleep homeostasis.*** In our data, while the Oddball condition fol-  
25 lowed the Fixation trajectories, the Standing condition did not. Theta Standing amplitudes did not  
26 increase past S3 during the extended wake period, and alpha Standing amplitudes neither decreased  
27 following sleep, nor did they increase during extended wake past S2. Given the overall larger ampli-  
28 tudes in this condition, this may be at least partially due to a ceiling effect, or a peculiarity of eyes-  
29 closed alpha. The occipital channels producing the highest quantity of alpha oscillations (Figure 8B)  
30 were also the ones who showed no increase in alpha amplitudes (Figure 8D), while frontal channels  
31 still showed a significant increase. At the same time, given the eyes-closed condition, it's also possible  
32 that participants were closer to "true sleep" during S8 Standing. This is supported by the complete

1 change in spectrogram in the Standing Back ROI (Figure 4). Altogether, our results indicate that oscil-  
2 lation amplitudes tend to reflect sleep homeostasis, however this is not the only factor contributing  
3 to these amplitudes. In practice, this means that different recording conditions will be more or less  
4 sensitive to changes in sleep homeostasis.

## 5 **Potential mechanisms behind the WMZ**

6 ***Cortical desynchronization during the WMZ.*** What did not match our predictions at all were oscilla-  
7 tory amplitudes during the WMZ. In both Fixation and Oddball, theta and alpha oscillation amplitudes  
8 decreased during the WMZ, then returned to their previous trajectories during S8. The effect sizes of  
9 the WMZ were actually larger for amplitudes compared to the number of oscillations (Table 01), with  
10 Fixation WMZ quantities only trending. The fact that oscillation amplitudes decreased implies that  
11 whatever mechanism drives the WMZ, it results in overall desynchronized cortical activity. In practice,  
12 this means that oscillation amplitudes can usually be used as a marker for homeostatic sleep pressure,  
13 except during the hours before habitual sleep. We don't consider this dip in amplitudes during the  
14 WMZ and the difference in Standing oscillation amplitudes to indicate that the models themselves are  
15 inaccurate, just that amplitudes of oscillations are no longer accurately reflecting the underlying neu-  
16 ronal synaptic strength and sleep homeostasis.

17 ***Timing and duration of the WMZ.*** It is noteworthy how the WMZ briefly interrupts both the linear  
18 increase in theta quantities and the saturating exponentials of theta and alpha amplitudes. This high-  
19 lights how the WMZ is limited in time, unlike the gradual circadian component of the two-process  
20 model (Figure 1A). The model was established based on measures of alertness, core body tempera-  
21 ture, and melatonin concentration, all of which changed approximately sinusoidally across 24 h (Åker-  
22 stedt et al., 1979). While none of our outcome measures were paralleling these sinusoidal fluctuations,  
23 almost all of them were clearly affected by the brief WMZ. We therefore suspect that a specific path-  
24 way is responsible for the WMZ, distinct from melatonin concentration and core body temperature,  
25 although still synchronized to the suprachiasmatic nucleus (SCN), the brain's timekeeper (Aston-Jones  
26 et al., 2001).

27 The timing of the WMZ in our study diverges slightly from some previous studies which find the WMZ  
28 to occur 3-6 h before bedtime (McMahon et al., 2018; Shekleton et al., 2013; Zeeuw et al., 2018), but  
29 is in agreement with others that find the WMZ 1-4 h before bedtime (Dijk & Czeisler, 1995; Lavie,  
30 1997). Studies like ours with later WMZ times were conducted under normal office lighting conditions  
31 (~150 lux, or no manipulation reported), whereas studies with earlier WMZ times were recorded un-  
32 der dim lighting conditions (<10 lux). As demonstrated by Gooley et al. (2011), brighter light shifts

1 melatonin onset to around 2 hours later, likely explaining the difference in results. This therefore  
2 means that whatever light-induced mechanism delays melatonin onset, it also delays WMZ onset.

3 **Neural pathways of the WMZ.** Given that both the mean and standard deviation of pupil diameters  
4 were also strongly affected by the WMZ (Figure 9), it is likely that the ascending arousal system (AAS)  
5 is involved. The AAS includes the locus coeruleus (LC), the ventral tegmental area and substantia nigra,  
6 the dorsal and median raphe nuclei, and the basal forebrain (Lloyd et al., 2022). All these areas have  
7 been linked to changes in pupil diameter (Joshi & Gold, 2020; Lloyd et al., 2022; Reimer et al., 2016),  
8 and have widespread connections to the rest of the cortex. The LC in particular has been linked to  
9 transitory pupil responses such as the increases observed during oddball tasks (Aston-Jones & Cohen,  
10 2005; Joshi et al., 2016; Murphy et al., 2014). Since we do not find an increase in pupil responses to  
11 oddball target tones in the WMZ (Figure 9C), this may suggest that of all the AAS, the LC is actually not  
12 involved in the WMZ. Alternatively, this may merely indicate that pupil oddball responses are not a  
13 reliable indicator of LC activity across time, and instead spontaneous pupil fluctuations such as those  
14 reflected in diameter standard deviations may be more representative. In this case, based on Figure  
15 9B, LC activity may be subjected to the combination of homeostatic sleep pressure, circadian pressure,  
16 and the WMZ. Unfortunately, due to reduced power, these results are suggestive at best, and further-  
17 more the link between LC and pupil diameters has not been unambiguously established. Hopefully  
18 future studies will be able to determine which nuclei are involved in the WMZ.

19 **The role of the WMZ in humans.** It may be difficult to investigate the intracortical mechanisms of the  
20 WMZ because it's possible the WMZ does not exist in rodents. The WMZ may even be human-specific  
21 because we have long consolidated sleep, unlike most other species (Campbell & Tobler, 1984). By  
22 ensuring that individuals do not initiate sleep too early, the WMZ largely guarantees that the subse-  
23 quent 8 hours of sleep are *completed* within the correct circadian window, thus maintaining continued  
24 synchronization with the overall circadian rhythm and environmental light-dark cycles. During normal  
25 wake, the WMZ may not be apparent or even necessary, however when homeostatic sleep pressure  
26 is unusually high (for example from insufficient sleep the night before), such a mechanism would be  
27 critical to maintain wakefulness until the onset of the correct sleep window. In polyphasic-sleep spe-  
28 cies such as mice and rats, the timing of sleep onset for any given sleep episode is less critical.

29 The WMZ needs to be investigated more. As speculated by Strogatz et al. (1987), such a mechanism  
30 may be behind sleep disorders such as insomnia; if the WMZ never "shuts off", this will result in sub-  
31 stantially delayed sleep onset; if it is not present at all, this could result in circadian desynchrony.  
32 Taking this one step further, control over the WMZ could improve general wellbeing; being able to

1 selectively shut it off could help with jetlag. Alternatively, activating the WMZ during night shifts could  
2 improve performance in critical industries such as emergency medicine or airline pilots.

### 3 **Recommendations, limitations, and outlook**

4 Our 4/24 study design has proven highly effective at capturing the WMZ, with multiple objective and  
5 subjective measures showing highly significant effects. The standard approach of starting with 8 h of  
6 sleep and then extending wake for more than 40 h does not often find effects during the first WMZ  
7 (McMahon et al., 2021; Shekleton et al., 2013), likely because normal wake is too close to ceiling.  
8 Given how burdensome 40 h of sleep deprivation can be, we recommend the use of sleep restriction  
9 for future research of the WMZ in both healthy and patient populations.

10 In addition to theta power, we found that the disappearance of ocular microsleeps is one of the best  
11 objective markers of the WMZ (Figure 11B), not previously described in the literature. These are quite  
12 easy to measure, requiring only eye-facing cameras. At the same time, while less sensitive, mean pupil  
13 diameter may instead be one of the more *specific* markers of the WMZ, as it was otherwise not as  
14 affected by increasing homeostatic sleep pressure, especially in the Oddball (Figure 9A). Other exper-  
15 iments have been conducted measuring pupil diameter during sleep deprivation, but did not find  
16 these effects in the WMZ (Daguet et al., 2019; Van Egroo et al., 2019). However, these studies meas-  
17 ured only the first WMZ under well-rested conditions and the sleep deprivation was never sufficiently  
18 long to capture the second. Therefore, as with all other measures of the WMZ, it may be critical to  
19 record pupillometry under at least somewhat elevated levels of sleep pressure.

20 While we are satisfied with many of the design choices for this experiment, there is room for improve-  
21 ment. Given the unexpected importance of the WMZ, we would have benefitted from a traditional  
22 circadian marker such as melatonin concentration, which would have allowed more precise synchro-  
23 nization across participants to circadian phase. Additionally, more frequent recordings (e.g. every  
24 hour) would have provided a better temporal resolution to delineate the start and end of the WMZ  
25 for each participant. Regarding the wake recordings, given that the Oddball condition produced the  
26 largest effect sizes, its possible more controlled tasks provide better results than Fixation. Regarding  
27 the analyses, we implemented a relatively basic cycle-by-cycle burst detection algorithm, and there is  
28 ample room for improvement following more systematic development of this approach.

29 Regarding the interpretation of the EEG results, it is important that they are replicated with datasets  
30 using much longer bouts of sleep deprivation, spanning more than a single 24 h period and with more  
31 than a single recording after the WMZ. Likewise, data exists using the forced desynchrony protocol  
32 (Cajochen et al., 2002) which can properly dissociate circadian from homeostatic changes, as well as

1 a constant routine protocol to control for homeostatic pressure (Cajochen et al., 2001). It would be  
2 important to see to what further extent amplitudes and number of bursts differently reflect circadian  
3 and homeostatic changes. Regarding the pupillometry results, it is important that they are replicated  
4 with larger sample sizes, and possibly comparing circadian changes with and without sleep restriction,  
5 as our results suggest an unexpected interaction.

## 6 **Conclusions**

7 In summary, by separately analyzing oscillation amplitudes and quantities, we were better able to  
8 validate the predictions of the two-process model of sleep and the synaptic homeostasis hypothesis.  
9 We demonstrated that both theta and alpha amplitudes increase with time awake, thus reflecting  
10 homeostatic sleep pressure. However, the wake maintenance zone proved to be such a potent con-  
11 tributor to wakefulness as to temporarily counteract these effects, impacting both the amplitudes and  
12 number of occurrences of oscillations. In addition to the EEG, we have identified ocular microsleeps  
13 as especially sensitive, and mean pupil diameter as specifically sensitive to this window. This specificity  
14 strongly suggests that the WMZ is caused by a wakefulness driver distinct from the gradual sinusoidal  
15 24 h circadian fluctuations in alertness. Finally, we speculate that the ascending arousal system may  
16 be crucially involved, and that the WMZ may be human-specific.

## 17 **METHODS**

18 Data from the task blocks of this experiment have been previously published in Snipes et al. (2022)  
19 where the overall study design, EEG preprocessing, and power analyses were established. Here, pre-  
20 viously reported methods will only be briefly described.

## 21 **Participants**

22 18 participants completed the experiment. University student applicants were screened for good  
23 health, good sleep quality, and at least some sleep deprivation vulnerability. 19 participants were re-  
24 cruited, and one participant dropped out midway. Of the 18 participants who completed the experi-  
25 ment, 9 were female and 3 were left-handed. Mean age ( $\pm$  standard deviation) was  $23 \pm 1$  years old.  
26 All self-reported no hearing impairments. Data collection and interaction with participants was con-  
27 ducted according to Swiss law (Ordinance on Human Research with the Exception of Clinical Trials)  
28 and the principles of the Declaration of Helsinki, with Zurich cantonal ethics approval BASEC-Nr. 2019-  
29 01193.



## 1 **Experiment Design**

2 Participants conducted a 4/24 extended wake paradigm, depicted in Figure 1. This involved habitua-  
3 tion to a regular sleep-wake schedule prior to the experiment (minimum 4 nights), with bedtimes and  
4 wakeup times selected to match the participant's preferred window and daily schedule. During the  
5 experiment, participants went to bed at their habitual bedtime, and were woken up 4 hours later.  
6 They were then kept awake for 24 h, followed by a recovery night. In addition to the extended wake  
7 bout, participants conducted a baseline night in which they slept during their habitual sleep window.  
8 The baseline was conducted before the extended wake bout in all but four participants.

9 The experiment schedule is in Figure 1B. Resting wake EEG recordings were measured before and after  
10 each night of sleep, and an additional 6 times during the 24 h wake period, for a total of 12 recordings.  
11 Prior to recordings S2-S7, participants were seated in the same position, watching 2 TV episodes  
12 around 40 minutes each, from a series of their choice. After each rest recording, participants were  
13 free to move around, and were provided with a home-cooked meal which they had selected from a  
14 list of vegetarian options (each meal during each break was the same). 6 of these breaks were in-  
15 cluded, each around 40 minutes (adjusting for delays in the schedule).

16 During the rest recordings, participants were seated in a comfortable armchair with a footrest (IKEA  
17 strandmon) in a well-lit room (~150 lux at eye level) and had to maintain fixation on a 20 cm red cross  
18 placed ~3 m from their head, ~30 cm below eye-level. The timing of the three rest recording conditions  
19 is depicted in Figure 1C. Each session began with a Fixation period, in which their only instructions  
20 were to maintain fixation on the cross and stay awake. This was immediately followed by an active  
21 auditory Oddball, where two types of tone were presented: standards (160 tones), and targets (40  
22 tones). Participants had to press a button whenever a target tone occurred, while maintaining fixation  
23 and staying awake. Each tone lasted 60 ms, and for each participant the tone was either 660 Hz or 440  
24 Hz for the targets, and vice versa for the standard tones. The interstimulus interval ranged randomly  
25 from 1.8 to 2.4 s, with a minimum of 3 standard tones between targets. After the Oddball, participants  
26 were provided a questionnaire to fill out, including the Karolinska Sleepiness Scale (Åkerstedt & Gill-  
27 berg, 1990). Finally, participants stood up from the chair and moved to lean against the wall and had  
28 a Standing period with eyes closed. The purpose of this condition was to have a long recording with  
29 eyes-closed, the most typical condition for alpha activity (Kirschfeld, 2005), without participants falling  
30 asleep. Caldwell et al. (2000) previously found that there was no effect on alpha activity when com-  
31 paring seated to standing recordings across sleep deprivation during eyes closed.

## 1 **EEG preprocessing & power analysis**

2 EEG data was recorded at 1000 Hz, with 129 electrodes including the Cz reference, using EGI HydroCel  
3 Geodesic Sensor nets. Four electrodes were external to the net, and were positioned on the mastoids  
4 and under the chin for sleep scoring (sleep architecture is available in Snipes et al. [2022]). Two elec-  
5 trodes (126, 127) were located on the cheeks and excluded, leaving 123 channels for EEG data analysis  
6 after re-referencing to the average. Preprocessing and data analyses were done using EEGLAB (De-  
7 lorme & Makeig, 2004) and custom MATLAB scripts. Data was downsampled to 250 Hz and filtered  
8 between 0.5-40 Hz. Major artifacts were identified visually, and physiological artifacts (eye move-  
9 ments, heartbeat, muscle activity) were removed with independent component analysis (ICA). Details  
10 are provided in Snipes et al. (2022).

11 Power was calculated as power spectral density using Welch's method with 8 s windows, Hanning  
12 tapered, 75% overlap. Power values for each participant and each frequency were z-scored pooling  
13 across sessions, conditions, and channels. Z-scored values were then averaged across all channels ex-  
14 cluding the outer-edge electrodes (Figure 3), or into 3 regions of interest (ROIs): Front, Center, and  
15 Back, marked in [Suppl. Figure 5-1](#) of Snipes et al. (2022). When plotting spectrograms, a 1 Hz lowess  
16 filter was used to smooth the signal (Figure 4).

## 17 **EEG burst analysis**

18 Burst detection was conducted with custom MATLAB scripts adapted from Cole and Voytek's (2019)  
19 cycle-by-cycle analysis, originally coded in Python. The pipeline described below is also provided sche-  
20 matically in Figure 12.

21 First, clean EEG data was filtered into narrow overlapping bands (2-6, 4-8, 6-10, 8-12, 10-14 Hz) using  
22 a minimum order high-pass then low-pass equiripple FIR filter (stopband frequency = passfrequency  
23  $\pm 1$  Hz, passband ripple 0.04 dB, stopband attenuation 40 dB). Zero-crossings were identified in the  
24 narrow-band filtered data. Then between descending zero-crossings and rising zero-crossings, nega-  
25 tive peaks were identified as the minimum value in the "unfiltered" data (minimally filtered during  
26 pre-processing between 0.5 and 40 Hz). Positive peaks were also identified as the maximum values in  
27 the unfiltered data between rising and descending zero-crossings, and these were used as the start  
28 and end of each cycle around the negative peak.

29 Once all the peaks were identified, 4 consecutive cycles had to meet the following properties in order  
30 to qualify as an oscillation burst: A) the cycle's negative peak had to correspond to a local minimum;  
31 B) the mean distance to the neighboring peaks had to be within the range of the period of the filter  
32 (e.g. between 0.1 - 0.17 s when filtering between 6-10 Hz); C) the minimum ratio between the distance

1 in time of the current peak to its neighbors had to be above 0.6 (i.e. similar consecutive periods); D)  
2 the rise amplitude, measured as the voltage difference between the prior positive peak to current  
3 negative peak, and decay amplitude of the cycle had to have a ratio of at least 0.5 (i.e. one flank was  
4 not less than half the amplitude of the other); E) the minimum ratio between the cycle amplitude  
5 (negative peak to positive peak voltage, averaging both neighboring positive peaks) and neighboring  
6 cycles had to be more than 0.6 (i.e. similar consecutive amplitudes); F) the proportion of timepoints  
7 decreasing in amplitude between previous positive peak and current negative peak, and timepoints  
8 increasing in amplitude between current peak and following positive peak, had to be above 0.6 (i.e.  
9 how much *time* during the cycle the signal went in the wrong direction); and G) the proportion of the  
10 voltage increasing from positive to negative peak, and decreasing from negative to positive peak, had  
11 to be above 0.6 (i.e. how much *amplitude* went in the wrong direction). The criteria B, E, and F are  
12 from Cole and Voytek, whereas A, C, D, and G are our additional optimizations. The parameters and  
13 burst-detection criteria were chosen through trial-and-error on an independent subset of data rec-  
14 orded during this experiment (the Game and PVT conditions of the SD task block reported in Snipes et  
15 al. [2022]). The procedure involved iteratively adjusting thresholds and introducing cycle exclusion  
16 criteria until the theta and alpha burst detection was largely consistent with visual inspection.

17 Bursts were detected for all frequency bands, using both the EEG signal and the negative of the EEG  
18 signal (because for mu-shaped rhythms, the sharper peaks resulted in better burst detection). Within  
19 each channel, overlapping bursts were compared, and the largest was retained intact. Smaller partially  
20 overlapping bursts were cut, and if the non-overlapping segment still retained 4 cycles, it was consid-  
21 ered a new burst. Then, bursts were aggregated across channels based on temporal overlap (at least  
22 50%) and if the mean frequency was within 1 Hz for the overlapping cycles.

23 Burst frequencies were defined as the reciprocal of the mean distances between negative peaks. Burst  
24 amplitudes were calculated by first averaging the rise and decay amplitudes of each cycle, then the  
25 average of these across all cycles in the aggregated bursts in different channels, then averaging the  
26 amplitude of all bursts within the band of interest. Burst quantities were calculated as the sum of all  
27 the cycles in the reference burst (the longest of all the overlapping bursts), divided by the duration of  
28 the recording, resulting in cycles per minute. This was chosen instead of the total number of bursts  
29 per minute because in extreme cases, bursts could become so long that their quantity decreased, and  
30 this was no longer representative of their occurrence in the data.

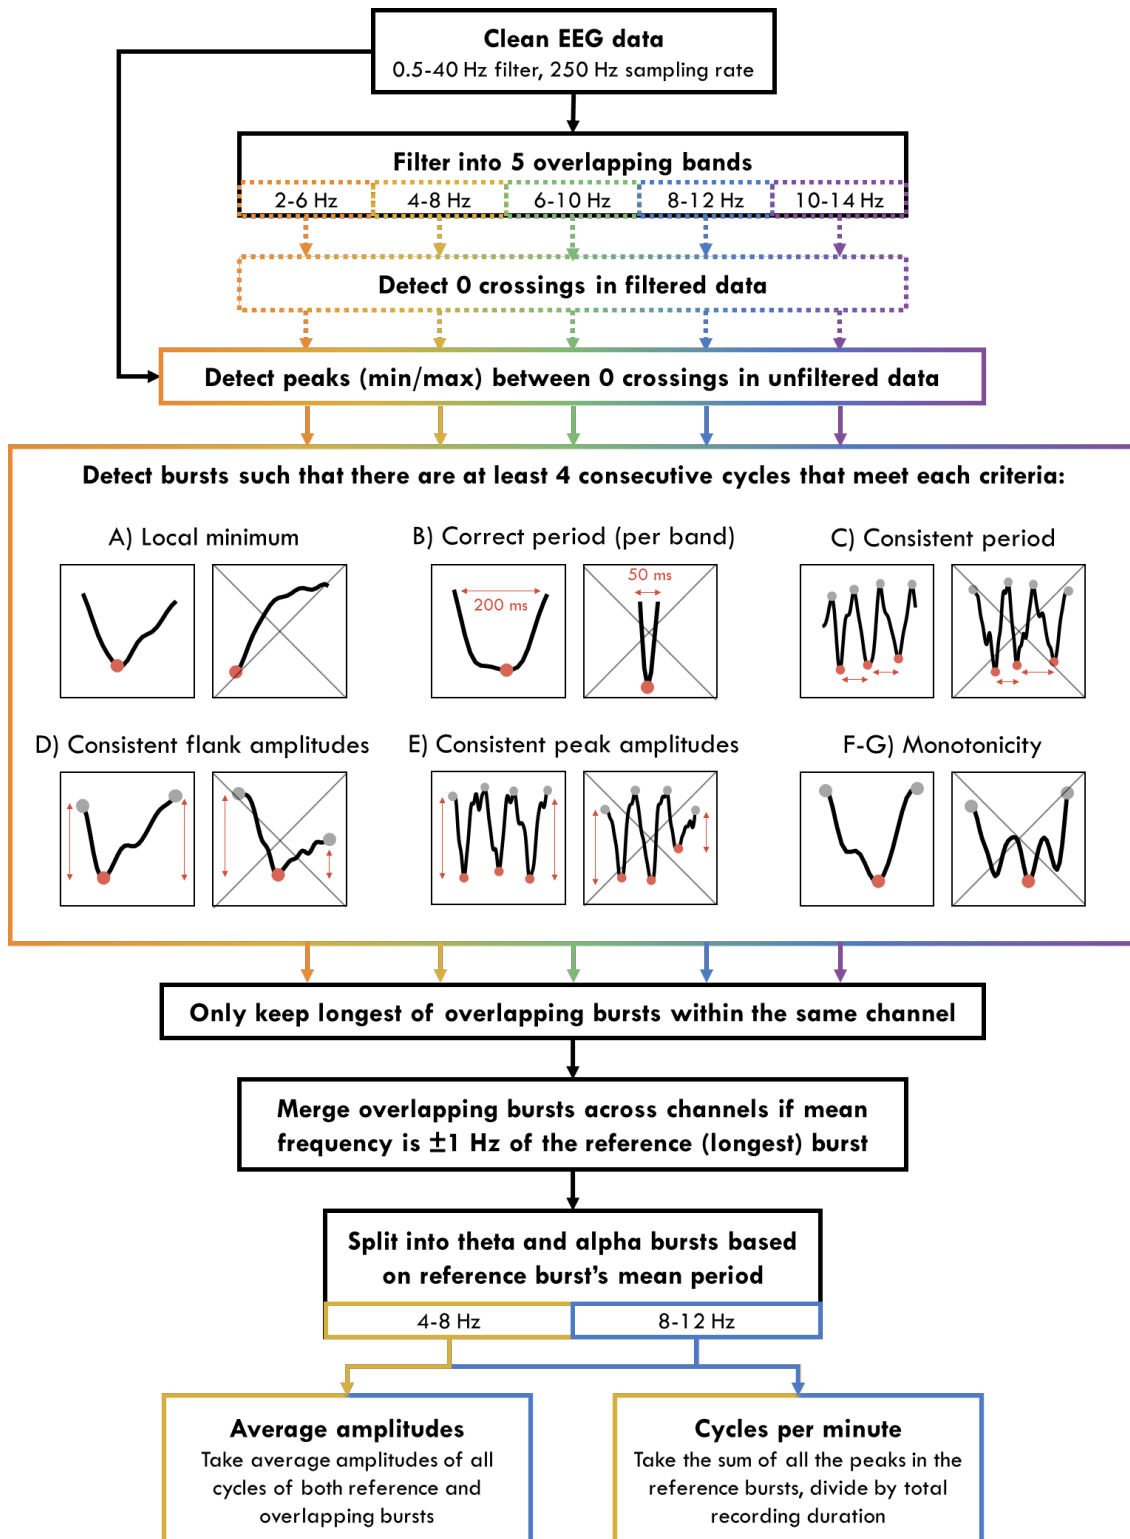

1

2 **Figure 12: Burst detection algorithm.** Solid outline indicates processes conducted on “unfiltered” data (only filtered between  
3 0.5 and 40 Hz), dotted lines indicate processes conducted on filtered data (in 4 Hz bands). Colors indicate data processed  
4 separately for each band, black indicates processes done on pooled/undifferentiated data. A-G are examples of cycles that  
5 do or do not meet the criteria (crossed out). A and B depict half-cycles, from zero-crossing to zero-crossing. D and F/G indicate  
6 a whole cycle, from positive peak to positive peak. C and E indicate 3 consecutive cycles. In cycle-examples, red circles indicate  
7 the negative peaks, and gray circles positive peaks.

## 1 **Eye tracking & pupillometry**

2 Eye tracking was done with Pupil Core “glasses” (Pupil Labs, Berlin, Germany). These were eyeglass  
3 frames with two rear-facing infra-red cameras. Pupil diameter was estimated from the video recorded  
4 with a sampling rate of on average 120 Hz. Data was exported using Pupil Player. All analyses were  
5 then conducted with a sampling rate of 50 Hz. During measurements, the eye tracker failed multiple  
6 times, resulting in substantial data loss. Sleep loss further resulted in noisier data (more eye-closure,  
7 less fixed gaze, half-closed eyelids).

8 The eye tracking variables blink rate and ocular microsleeps were measured using the confidence val-  
9 ues of the pupil diameter estimates (from 0 to 1): when model confidence fell below 0.5, this was  
10 considered an eye-closure. This approach was chosen based on our observation of the video relative  
11 to the model confidence. Consecutive timepoints with confidence values over 0.5 that lasted less than  
12 50 ms were still considered eyes-closed, and consecutive timepoints under 0.5 and less than 50 ms  
13 long were considered eyes open. The cutoff to split blinks and microsleeps was based on previous  
14 research identifying microsleeps as short as 1 s (Hertig-Godeschalk et al., 2020).

15 2D pupil diameter was estimated from the eye videos offline with Pupil Player, measured in pixels.  
16 Between the recordings, the eye tracking glasses were removed and readjusted. Therefore, in order  
17 to compare mean pupil diameter across sessions, the diameters in pixels had to be re-scaled. For every  
18 video, a frame was selected (192 x 192 pixels, 4.5 x 4.5 cm), and the eye’s iris diameter was measured  
19 in centimeters (when viewed at an angle, a disk becomes an ellipse, and the largest diameter of the  
20 ellipse is the diameter of the disk). By using the human mean iris diameter (12 mm), a conversion  
21 factor was calculated between pixels and millimeters, and this was applied to all 2D pupil diameter  
22 measurements:

$$23 \quad \text{pupil (mm)} = \frac{\text{pupil (px)} \times \text{video width (cm)} \times \text{standard iris (mm)}}{\text{iris (cm)} \times \text{video width (px)}}$$

24 While this does not preserve individual differences in eye-size, it is sufficient for comparing across-  
25 session changes in diameter within participants (reasonably assuming irises do not change in size with  
26 sleep pressure). Furthermore, it allows the exclusion of unphysiological outliers.

27 Pupil preprocessing was done with the PhysioData toolbox (Kret & Sjak-Shie, 2019). Finally, removed  
28 datapoints less than 0.5 s were linearly interpolated, and then isolated chunks of datapoints less than  
29 0.5 s were removed. Only data from one eye was used for each participant. The eye was chosen based  
30 on which had the most data after preprocessing.

1 To measure pupillary response to deviant tones during the Oddball, pupil diameters were epoched  
2 between -0.5 and 2 s relative to tone onset. All 40 targets were used, with 40 standards taken from  
3 the trial just prior to each target. Trials with less than 2/3 of clean timepoints were excluded. Record-  
4 ings with less than 15 trials for either targets or standards were excluded. Furthermore, if any  
5 *timepoint* for a given tone type was derived by averaging fewer than 10 trials, this session was also  
6 excluded.

7 For each trial, the pupil response to tones was first baseline corrected (the mean between -0.5-0 s was  
8 subtracted from all datapoints in the trial), then all trials were averaged for each recording, split by  
9 target and standard tones. Participants with fewer than 6 recordings out of the 12 were excluded.  
10 Finally, average pupil responses for all timepoints, both targets and standards, and all sessions were  
11 z-scored within each participant. Pupillary response was calculated as the area under the curve be-  
12 tween 0.5 and 2 s between target and standard.

13

## 14 **Statistics**

15 All statistics were paired t-tests, with  $\alpha = 5\%$ . All t-tests were conducted on z-scored values (pooling  
16 sessions and conditions for each participant) so as to better account for interindividual differences,  
17 provide more normally distributed datapoints, and more fair comparison of effect sizes across out-  
18 come measures. Due to occasional data loss for different outcome measures, the degrees of freedom  
19 are always provided, from which the sample size can be inferred ( $N = DF+1$ ).

20 Tests were selected a-priori for BL Pre vs BL Post to quantify overnight changes, and S1 vs S8 to quan-  
21 tify wake changes. To quantify the WMZ, a single value based on the average of the two recordings  
22 systematically showing effects (S6 and S7) were used. These were compared to an “expected” value  
23 based on S5 and S8, linearly interpolated. While previous studies quantified the effect by comparing  
24 WMZ values with measurements just prior, we considered this an under-estimate of the effect, as it  
25 doesn’t take into account the overall trajectory of the data, i.e. what values those timepoints would  
26 have had without the presence of the WMZ. However, our method can also overestimate the WMZ,  
27 if either S5 or S8 deviated substantially from the rest of the recordings. Therefore, results were inter-  
28 preted in the context of the trajectories observed in the figures.

29 Hedge’s *g* effect sizes were reported for each test in Table 1, calculated with the Measures of Effect  
30 Size Toolbox (Hentschke & Stüttgen, 2011). Effect sizes are evaluated with Cohen’s rule-of-thumb (J.  
31 Cohen, 1988) such that *g* values  $<.2$  are “small”, around 0.5 “medium”, and  $>.8$  “large”.

1 No correction for multiple comparisons was done for these tests as the majority were rather exploratory (i.e. Oddball/Standing conditions), there were a mixture of dependent and independent comparisons, and the goal was comparing effects across outcome measurements (amplitudes vs quantities) rather than establishing significance. However, false-discovery rate correction (Benjamini & Hochberg, 1995) was conducted for the 123 t-tests in the topographies of Figure 8C-D.

## 6 **Code and data availability**

7 Data used for Table 1 and Figures 2, 3, 7, 9 & 11 will be in Supplementary Materials, both untransformed and z-scored values. Additional unprocessed data is available upon request. All code is open source:

- 10 • The cycle-by-cycle analysis implemented in MATLAB: <https://github.com/HuberSleepLab/Matcycle>.
- 11
- 12 • The data analysis: [https://github.com/snipeso/2Process\\_Bursts](https://github.com/snipeso/2Process_Bursts).
- 13 • The EEG preprocessing: <https://github.com/snipeso/Theta-SD-vs-WM>.
- 14 • The plotting graphics: <https://github.com/snipeso/chART>.
- 15 • The two-process model in Figure 1A: <https://github.com/HuberSleepLab/2processmodel>.
- 16 • The pupil preprocessing toolbox: <https://github.com/Elios-S/pupil-size>

## 17 **ACKNOWLEDGEMENTS**

18 This study was conducted as part of the SleepLoop Flagship project of Hochschulmedizin Zürich, with additional funding from the Swiss National Science Foundation (320030\_179443) and Hirnstiftung. Marc Bächinger provided the eye-tracking equipment, technical assistance, and advice on the oddball protocol. Professor Christian Baumann and Niklas Schneider provided the EEG equipment. Simone Accascina helped with task programming and provided technical support during data collection. Noa Rieger aided with data collection. Lastly, a special thank you to all of our participants for taking part in this study.

25

## 26 **BIBLIOGRAPHY**

27 Aeschbach, D., Matthews, J. R., Postolache, T. T., Jackson, M. A., Giesen, H. A., & Wehr, T. A. (1997). Dynamics of the human EEG during prolonged wakefulness: Evidence for frequency-specific circadian and homeostatic influences. *Neuroscience Letters*, 239(2–3), 121–124. [https://doi.org/10.1016/S0304-3940\(97\)00904-X](https://doi.org/10.1016/S0304-3940(97)00904-X)



- 1 Åkerstedt, T., Fröberg, J. E., Friberg, Y., & Wetterberg, L. (1979). Melatonin excretion, body temperature and  
2 subjective arousal during 64 hours of sleep deprivation. *Psychoneuroendocrinology*, *4*(3), 219–225.  
3 [https://doi.org/10.1016/0306-4530\(79\)90005-2](https://doi.org/10.1016/0306-4530(79)90005-2)
- 4 Åkerstedt, T., & Gillberg, M. (1990). Subjective and objective sleepiness in the active individual. *International*  
5 *Journal of Neuroscience*, *52*(1–2), 29–37. <https://doi.org/10.3109/00207459008994241>
- 6 Aston-Jones, G., Chen, S., Zhu, Y., & Oshinsky, M. L. (2001). A neural circuit for circadian regulation of arousal.  
7 *Nature Neuroscience*, *4*(7), Article 7. <https://doi.org/10.1038/89522>
- 8 Aston-Jones, G., & Cohen, J. D. (2005). An integrative theory of locus coeruleus-norepinephrine function:  
9 Adaptive gain and optimal performance. *Annual Review of Neuroscience*, *28*(1), 403–450.  
10 <https://doi.org/10.1146/annurev.neuro.28.061604.135709>
- 11 Barbato, G., De Padova, V., Paolillo, A. R., Arpaia, L., Russo, E., & Ficca, G. (2007). Increased spontaneous eye  
12 blink rate following prolonged wakefulness. *Physiology & Behavior*, *90*(1), 151–154.  
13 <https://doi.org/10.1016/j.physbeh.2006.09.023>
- 14 Benjamini, Y., & Hochberg, Y. (1995). Controlling the false discovery rate: A practical and powerful approach to  
15 multiple testing. *Journal of the Royal Statistical Society. Series B (Methodological)*, *57*(1), 289–300.  
16 <https://doi.org/10.2307/2346101>
- 17 Bernardi, G., Siclari, F., Yu, I., Zennig, C., Bellesi, M., Ricciardi, E., Cirelli, C., Ghilardi, M. F., Pietrini, P., & Tononi,  
18 G. (2015). Neural and behavioral correlates of extended training during sleep deprivation in humans:  
19 Evidence for local, task-specific effects. *Journal of Neuroscience*, *35*(11), 4487–4500.  
20 <https://doi.org/10.1523/JNEUROSCI.4567-14.2015>
- 21 Borbély, A. A. (1982). A two process model of sleep regulation. *Human Neurobiology*, *1*(3), 195–204.
- 22 Cajochen, C., Knoblauch, V., Kräuchi, K., Renz, C., & Wirz-Justice, A. (2001). Dynamics of frontal EEG activity,  
23 sleepiness and body temperature under high and low sleep pressure. *NeuroReport*, *12*(10).  
24 <https://doi.org/10.1097/00001756-200107200-00046>
- 25 Cajochen, C., Wyatt, J. K., Czeisler, C. A., & Dijk, D. J. (2002). Separation of circadian and wake duration-de-  
26 pendent modulation of EEG activation during wakefulness. *Neuroscience*, *114*(4), 1047–1060.  
27 [https://doi.org/10.1016/S0306-4522\(02\)00209-9](https://doi.org/10.1016/S0306-4522(02)00209-9)
- 28 Caldwell, J. A., Prazinko, B. F., & Hall, K. K. (2000). The effects of body posture on resting electroencephalo-  
29 graphic activity in sleep-deprived subjects. *Clinical Neurophysiology*, *111*(3), 464–470.  
30 [https://doi.org/10.1016/S1388-2457\(99\)00289-8](https://doi.org/10.1016/S1388-2457(99)00289-8)
- 31 Campbell, S. S., & Tobler, I. (1984). Animal sleep: A review of sleep duration across phylogeny. *Neuroscience &*  
32 *Biobehavioral Reviews*, *8*(3), 269–300. [https://doi.org/10.1016/0149-7634\(84\)90054-X](https://doi.org/10.1016/0149-7634(84)90054-X)
- 33 Cohen, J. (1988). *Statistical power analysis for the behavioral sciences* (2nd ed). L. Erlbaum Associates.
- 34 Cohen, M. X. (2014). *Analyzing Neural Time Series Data: Theory and Practice*. <https://doi.org/10.7551/mit-press/9609.001.0001>
- 36 Cole, S., & Voytek, B. (2019). Cycle-by-cycle analysis of neural oscillations. *Journal of Neurophysiology*, *122*(2).  
37 <https://doi.org/10.1152/JN.00273.2019>

- 1 Crevits, L., Simons, B., & Wildenbeest, J. (2003). Effect of Sleep Deprivation on Saccades and Eyelid Blinking.  
2 *European Neurology*, 50(3), 176–180. <https://doi.org/10.1159/000073060>
- 3 Daguét, I., Bouhassira, D., & Gronfier, C. (2019). Baseline Pupil Diameter Is Not a Reliable Biomarker of Subjec-  
4 tive Sleepiness. *Frontiers in Neurology*, 10. <https://www.frontiersin.org/arti->  
5 [cles/10.3389/fneur.2019.00108](https://doi.org/10.3389/fneur.2019.00108)
- 6 Delorme, A., & Makeig, S. (2004). EEGLAB: An open source toolbox for analysis of single-trial EEG dynamics in-  
7 cluding independent component analysis. *Journal of Neuroscience Methods*, 134(1), 9–21.  
8 <https://doi.org/10.1016/j.jneumeth.2003.10.009>
- 9 Dijk, D. J., Beersma, D. G. M., & Daan, S. (1987). EEG Power Density during Nap Sleep: Reflection of an Hour-  
10 glass Measuring the Duration of Prior Wakefulness. *Journal of Biological Rhythms*, 2(3), 207–219.  
11 <https://doi.org/10.1177/074873048700200304>
- 12 Dijk, D. J., & Czeisler, C. A. (1995). Contribution of the circadian pacemaker and the sleep homeostat to sleep  
13 propensity, sleep structure, electroencephalographic slow waves, and sleep spindle activity in hu-  
14 mans. *Journal of Neuroscience*, 15(5), 3526–3538. <https://doi.org/10.1523/JNEUROSCI.15-05->  
15 [03526.1995](https://doi.org/10.1523/JNEUROSCI.15-05-03526.1995)
- 16 Donoghue, T., Haller, M., Peterson, E. J., Varma, P., Sebastian, P., Gao, R., Noto, T., Lara, A. H., Wallis, J. D.,  
17 Knight, R. T., Shestyuk, A., & Voytek, B. (2020). Parameterizing neural power spectra into periodic and  
18 aperiodic components. *Nature Neuroscience*, 23(12), Article 12. <https://doi.org/10.1038/s41593-020->  
19 [00744-x](https://doi.org/10.1038/s41593-020-00744-x)
- 20 Esser, S. K., Hill, S. L., & Tononi, G. (2007). Sleep Homeostasis and Cortical Synchronization: I. Modeling the Ef-  
21 fects of Synaptic Strength on Sleep Slow Waves. *Sleep*, 30(12), 1617–1630.  
22 <https://doi.org/10.1093/sleep/30.12.1617>
- 23 Fatt, I., & Weissman, B. A. (2013). *Physiology of the Eye: An Introduction to the Vegetative Functions*. Butter-  
24 worth-Heinemann.
- 25 Finelli, L. A., Baumann, H., Borbély, A. A., & Achermann, P. (2000). Dual electroencephalogram markers of hu-  
26 man sleep homeostasis: Correlation between theta activity in waking and slow-wave activity in sleep.  
27 *Neuroscience*, 101(3), 523–529. [https://doi.org/10.1016/S0306-4522\(00\)00409-7](https://doi.org/10.1016/S0306-4522(00)00409-7)
- 28 Gooley, J. J., Chamberlain, K., Smith, K. A., Khalsa, S. B. S., Rajaratnam, S. M. W., Van Reen, E., Zeitzer, J. M.,  
29 Czeisler, C. A., & Lockley, S. W. (2011). Exposure to Room Light before Bedtime Suppresses Melatonin  
30 Onset and Shortens Melatonin Duration in Humans. *The Journal of Clinical Endocrinology & Metabo-*  
31 *lism*, 96(3), E463–E472. <https://doi.org/10.1210/jc.2010-2098>
- 32 Hauglund, N. L., Pavan, C., & Nedergaard, M. (2020). Cleaning the sleeping brain – the potential restorative  
33 function of the glymphatic system. *Current Opinion in Physiology*, 15, 1–6.  
34 <https://doi.org/10.1016/j.cophys.2019.10.020>
- 35 Hentschke, H., & Stüttgen, M. C. (2011). Computation of measures of effect size for neuroscience data sets.  
36 *European Journal of Neuroscience*, 34(12), 1887–1894. <https://doi.org/10.1111/j.1460->  
37 [9568.2011.07902.x](https://doi.org/10.1111/j.1460-9568.2011.07902.x)

- 1 Hertig-Godeschalk, A., Skorucak, J., Malafeev, A., Achermann, P., Mathis, J., & Schreier, D. R. (2020). Micro-  
2 sleep episodes in the borderland between wakefulness and sleep. *Sleep*, *43*(1).  
3 <https://doi.org/10.1093/sleep/zsz163>
- 4 Hung, C. S., Sarasso, S., Ferrarelli, F., Riedner, B., Ghilardi, M. F., Cirelli, C., & Tononi, G. (2013). Local experi-  
5 ence-dependent changes in the wake EEG after prolonged wakefulness. *Sleep*, *36*(1), 59–72.  
6 <https://doi.org/10.5665/sleep.2302>
- 7 Jongkees, B. J., & Colzato, L. S. (2016). Spontaneous eye blink rate as predictor of dopamine-related cognitive  
8 function—A review. *Neuroscience & Biobehavioral Reviews*, *71*, 58–82. <https://doi.org/10.1016/j.neuro->  
9 [biorev.2016.08.020](https://doi.org/10.1016/j.neurobiorev.2016.08.020)
- 10 Joshi, S., & Gold, J. I. (2020). Pupil Size as a Window on Neural Substrates of Cognition. *Trends in Cognitive Sci-*  
11 *ences*, *24*(6), 466–480. <https://doi.org/10.1016/j.tics.2020.03.005>
- 12 Joshi, S., Li, Y., Kalwani, R. M., & Gold, J. I. (2016). Relationships between Pupil Diameter and Neuronal Activity  
13 in the Locus Coeruleus, Colliculi, and Cingulate Cortex. *Neuron*, *89*(1), 221–234.  
14 <https://doi.org/10.1016/j.neuron.2015.11.028>
- 15 Killgore, W. D. S. (2010). Effects of sleep deprivation on cognition. In G. A. Kerkhof & H. P. A. van Dongen (Eds.),  
16 *Progress in Brain Research* (Vol. 185, pp. 105–129). Elsevier. <https://doi.org/10.1016/B978-0-444->  
17 [53702-7.00007-5](https://doi.org/10.1016/B978-0-444-53702-7.00007-5)
- 18 Kirschfeld, K. (2005). The physical basis of alpha waves in the electroencephalogram and the origin of the “ber-  
19 ger effect.” *Biological Cybernetics*, *92*(3), 177–185. <https://doi.org/10.1007/s00422-005-0547-1>
- 20 Kret, M. E., & Sjak-Shie, E. E. (2019). Preprocessing pupil size data: Guidelines and code. *Behavior Research*  
21 *Methods*, *51*(3), 1336–1342. <https://doi.org/10.3758/s13428-018-1075-y>
- 22 Kwon, K.-A., Shipley, R. J., Edirisinghe, M., Ezra, D. G., Rose, G., Best, S. M., & Cameron, R. E. (2013). High-speed  
23 camera characterization of voluntary eye blinking kinematics. *Journal of the Royal Society Interface*,  
24 *10*(85), 20130227. <https://doi.org/10.1098/rsif.2013.0227>
- 25 Lavie, P. (1986). Ultrashort sleep-waking schedule. III. ‘Gates’ and ‘Forbidden zones’ for sleep. *Electroenceph-*  
26 *alography and Clinical Neurophysiology*, *63*(5), 414–425. <https://doi.org/10.1016/0013->  
27 [4694\(86\)90123-9](https://doi.org/10.1016/0013-4694(86)90123-9)
- 28 Lavie, P. (1997). Melatonin: Role in Gating Nocturnal Rise in Sleep Propensity. *Journal of Biological Rhythms*,  
29 *12*(6). <https://doi.org/10.1177/074873049701200622>
- 30 Lloyd, B., Voogd, L. D. de, Mäki-Marttunen, V., & Nieuwenhuis, S. (2022). *Assessing pupil size as an index of*  
31 *activation of subcortical ascending arousal system nuclei during rest* (p. 2022.11.04.514984). bioRxiv.  
32 <https://doi.org/10.1101/2022.11.04.514984>
- 33 McMahon, W. R., Ftouni, S., Diep, C., Collet, J., Lockley, S. W., Rajaratnam, S. M. W., Maruff, P., Drummond, S.  
34 P. A., & Anderson, C. (2021). The impact of the wake maintenance zone on attentional capacity, physi-  
35 ological drowsiness, and subjective task demands during sleep deprivation. *Journal of Sleep Research*,  
36 *30*(5), e13312. <https://doi.org/10.1111/jsr.13312>

- 1 McMahon, W. R., Ftouni, S., Drummond, S. P. A., Maruff, P., Lockley, S. W., Rajaratnam, S. M. W., & Anderson,  
2 C. (2018). The wake maintenance zone shows task dependent changes in cognitive function following  
3 one night without sleep. *Sleep*, 41(10), zsy148. <https://doi.org/10.1093/sleep/zsy148>
- 4 Moller, H. J., Kayumov, L., Bulmash, E. L., Nhan, J., & Shapiro, C. M. (2006). Simulator performance, microsleep  
5 episodes, and subjective sleepiness: Normative data using convergent methodologies to assess driver  
6 drowsiness. *Journal of Psychosomatic Research*, 61(3), 335–342. <https://doi.org/10.1016/j.jpsy->  
7 [chores.2006.04.007](https://doi.org/10.1016/j.jpsy-chores.2006.04.007)
- 8 Murphy, P. R., O'Connell, R. G., O'Sullivan, M., Robertson, I. H., & Balsters, J. H. (2014). Pupil diameter covaries  
9 with BOLD activity in human locus coeruleus. *Human Brain Mapping*, 35(8), 4140–4154.  
10 <https://doi.org/10.1002/hbm.22466>
- 11 Ong, J. L., Asplund, C. L., Chia, T. T. Y., & Chee, M. W. L. (2013). Now You Hear Me, Now You Don't: Eyelid Clo-  
12 sures as an Indicator of Auditory Task Disengagement. *Sleep*, 36(12), 1867–1874.  
13 <https://doi.org/10.5665/sleep.3218>
- 14 Poudel, G. R., Innes, C. R. H., Bones, P. J., Watts, R., & Jones, R. D. (2014). Losing the struggle to stay awake:  
15 Divergent thalamic and cortical activity during microsleeps. *Human Brain Mapping*, 35(1), 257–269.  
16 <https://doi.org/10.1002/hbm.22178>
- 17 Reimer, J., McGinley, M. J., Liu, Y., Rodenkirch, C., Wang, Q., McCormick, D. A., & Tolia, A. S. (2016). Pupil fluc-  
18 tuations track rapid changes in adrenergic and cholinergic activity in cortex. *Nature Communications*,  
19 7(1), Article 1. <https://doi.org/10.1038/ncomms13289>
- 20 Riedner, B. A., Vyazovskiy, V. V., Huber, R., Massimini, M., Esser, S., Murphy, M., & Tononi, G. (2007). Sleep ho-  
21 meostasis and cortical synchronization: III. A high-density EEG study of sleep slow waves in humans.  
22 *Sleep*, 30(12), 1643–1657. <https://doi.org/10.1093/sleep/30.12.1643>
- 23 Shekleton, J. A., Rajaratnam, S. M. W., Gooley, J. J., Van, R. E., Czeisler, C. A., & Lockley, S. W. (2013). Improved  
24 Neurobehavioral Performance during the Wake Maintenance Zone. *Journal of Clinical Sleep Medicine*,  
25 09(04), 353–362. <https://doi.org/10.5664/jcsm.2588>
- 26 Skorucak, J., Hertig-Godeschalk, A., Achermann, P., Mathis, J., & Schreier, D. R. (2020). Automatically Detected  
27 Microsleep Episodes in the Fitness-to-Drive Assessment. *Frontiers in Neuroscience*, 14.  
28 <https://www.frontiersin.org/articles/10.3389/fnins.2020.00008>
- 29 Snipes, S., Krugliakova, E., Meier, E., & Huber, R. (2022). The theta paradox: 4-8 Hz EEG oscillations reflect both  
30 sleep pressure and cognitive control. *Journal of Neuroscience*. <https://doi.org/10.1523/JNEURO->  
31 [SCI.1063-22.2022](https://doi.org/10.1523/JNEURO-SCI.1063-22.2022)
- 32 Strijkstra, A. M., Beersma, D. G. M., Drayer, B., Halbesma, N., & Daan, S. (2003). Subjective sleepiness corre-  
33 lates negatively with global alpha (8-12 Hz) and positively with central frontal theta (4-8 Hz) frequen-  
34 cies in the human resting awake electroencephalogram. *Neuroscience Letters*, 340(1), 17–20.  
35 [https://doi.org/10.1016/S0304-3940\(03\)00033-8](https://doi.org/10.1016/S0304-3940(03)00033-8)
- 36 Strogatz, S. H., Kronauer, R. E., & Czeisler, C. A. (1987). Circadian pacemaker interferes with sleep onset at spe-  
37 cific times each day: Role in insomnia. *American Journal of Physiology - Regulatory Integrative and*  
38 *Comparative Physiology*, 253(1 (22/1)). <https://doi.org/10.1152/ajpregu.1987.253.1.r172>

- 1 Tononi, G., & Cirelli, C. (2003). Sleep and synaptic homeostasis: A hypothesis. *Brain Research Bulletin*, *62*(2),  
2 143–150. <https://doi.org/10.1016/j.brainresbull.2003.09.004>
- 3 Tononi, G., & Cirelli, C. (2014). Sleep and the Price of Plasticity: From Synaptic and Cellular Homeostasis to  
4 Memory Consolidation and Integration. *Neuron*, *81*(1), 12–34. <https://doi.org/10.1016/j.neuron.2013.12.025>  
5
- 6 Van Dongen, H. P. A., Maislin, G., Mullington, J. M., & Dinges, D. F. (2003). The Cumulative Cost of Additional  
7 Wakefulness: Dose-Response Effects on Neurobehavioral Functions and Sleep Physiology From  
8 Chronic Sleep Restriction and Total Sleep Deprivation. *Sleep*, *26*(2), 117–126.  
9 <https://doi.org/10.1093/sleep/26.2.117>
- 10 Van Egroo, M., Gaggioni, G., Cespedes-Ortiz, C., Ly, J. Q. M., & Vandewalle, G. (2019). Steady-State Pupil Size  
11 Varies with Circadian Phase and Sleep Homeostasis in Healthy Young Men. *Clocks & Sleep*, *1*(2), Article  
12 2. <https://doi.org/10.3390/clockssleep1020021>
- 13 Vyazovskiy, V. V., & Harris, K. D. (2013). Sleep and the single neuron: The role of global slow oscillations in indi-  
14 vidual cell rest. *Nature Reviews Neuroscience*, *14*(6), Article 6. <https://doi.org/10.1038/nrn3494>
- 15 Vyazovskiy, V. V., Riedner, B. A., Cirelli, C., & Tononi, G. (2007). Sleep Homeostasis and Cortical Synchroniza-  
16 tion: II. A Local Field Potential Study of Sleep Slow Waves in the Rat. *Sleep*, *30*(12), 1631–1642.  
17 <https://doi.org/10.1093/sleep/30.12.1631>
- 18 Wyatt, J. K., Cecco, A. R.-D., Czeisler, C. A., & Dijk, D.-J. (1999). Circadian temperature and melatonin rhythms,  
19 sleep, and neurobehavioral function in humans living on a 20-h day. *American Journal of Physiology-*  
20 *Regulatory, Integrative and Comparative Physiology*, *277*(4), R1152–R1163.  
21 <https://doi.org/10.1152/ajpregu.1999.277.4.R1152>
- 22 Xie, L., Kang, H., Xu, Q., Chen, M. J., Liao, Y., Thiyagarajan, M., O'Donnell, J., Christensen, D. J., Nicholson, C.,  
23 Iliff, J. J., Takano, T., Deane, R., & Nedergaard, M. (2013). Sleep Drives Metabolite Clearance from the  
24 Adult Brain. *Science*, *342*(6156), 373–377. <https://doi.org/10.1126/science.1241224>
- 25 Zeeuw, J. de, Wisniewski, S., Papakonstantinou, A., Bes, F., Wahnschaffe, A., Zaleska, M., Kunz, D., & Münch,  
26 M. (2018). The alerting effect of the wake maintenance zone during 40 hours of sleep deprivation.  
27 *Scientific Reports*, *8*(1), Article 1. <https://doi.org/10.1038/s41598-018-29380-z>
- 28
- 29
